# Supplementary material for: Extending the chemistry of carbones: P–N bond cleavage via an SN2′-like mechanism
Source: Royal Society of Chemistry journal article supplement (doi:10.1039/c5cc03194j), 2015-01-01
Supplement: c5cc03194j1.pdf [file c5cc03194j1.pdf]

### Experimental Details and Spectroscopic Data

All preparations and manipulations were carried out using standard Schlenk techniques and a dry-box under argon atmosphere. Solvents (n-pentane, n-hexane, tetrahydrofuran, toluene and benzene were distilled over sodium/benzophenone while dichloromethane (DCM), 1,2-difluorobenzene, C<sub>6</sub>D<sub>6</sub>, CDCl<sub>3</sub>, CD<sub>3</sub>CN, CD<sub>2</sub>Cl<sub>2</sub>, were distilled over CaH<sub>2</sub>. All solvents were stored over 4 Å molecular sieves prior to use. The commercial products aluminium trichloride and sodium hexafluoroantimonate were used without further purification. Phosphines such as (PCl<sub>3</sub> and <sup>t</sup>BuPCl<sub>2</sub>) were distilled prior to use, and MeN(PCl<sub>2</sub>)<sub>2</sub> was purchased from Sigma Aldrich and used without further purification. PhN(PCl<sub>2</sub>)<sub>2</sub>, NaBAR<sup>Cl</sup><sub>4</sub> (Ar<sup>Cl</sup> = 3,5-Cl<sub>2</sub>-C<sub>6</sub>H<sub>3</sub>) and the ligands carbodiphosphorane and carbodicarbene were prepared by literature methods.<sup>S1</sup> NMR spectra were obtained on a Brüker Avance III 400 and JEOL ECA 400 instrument. Chemical shifts (δ) are reported in parts per million (ppm) downfield from internal - tetramethylsilane (for <sup>1</sup>H and <sup>13</sup>C{<sup>1</sup>H}) and external standard - 85% phosphoric acid (for <sup>31</sup>P{<sup>1</sup>H}). Mass spectra were obtained on Waters Q-TOF Premier MS mass spectrometer using the electrospray ionization (ESI) mode.

#### Synthesis of [(PPh<sub>3</sub>)<sub>2</sub>C-PCl<sub>2</sub>][AlCl<sub>4</sub>], [1-PCl<sub>2</sub>][AlCl<sub>4</sub>]

The chloride salt of this compound was synthesized by adding 80 mL of toluene solution of (PPh<sub>3</sub>)<sub>2</sub>C (**1**) 0.10 g (0.19 mmol) to 2.0 equivalents of MeN(PCl<sub>2</sub>)<sub>2</sub> or PhN(PCl<sub>2</sub>)<sub>2</sub>. The reaction was stirred overnight followed by filtration. The resulting white solid was dissolved in 1,2-difluorobenzene and quantitative counterion conversion was achieved by adding 1.0 equivalent of AlCl<sub>3</sub>. Single crystals of [1-PCl<sub>2</sub>][AlCl<sub>4</sub>] suitable for X-ray analysis were obtained by layering the above solution with n-hexane. Note: The compound [1-PCl<sub>2</sub>][Cl] can also be synthesized from the reaction of **1** with PCl<sub>3</sub> (See reference 8 in the main text). <sup>1</sup>H NMR (300 MHz, CD<sub>2</sub>Cl<sub>2</sub>): δ 7.19-7.72 (m, 30H, Ph). <sup>13</sup>C{<sup>1</sup>H} (100 MHz, CD<sub>2</sub>Cl<sub>2</sub>): δ 124.0 (br, m, *ipso*-C, Ph<sub>(carbonyl)</sub>), 129.9 (virtual triplet, *o*-C, Ph<sub>(carbonyl)</sub>), 133.6 (s, *p*-C, Ph<sub>(carbonyl)</sub>), 134.3 (virtual triplet, *m*-C, Ph<sub>(carbonyl)</sub>). <sup>31</sup>P{<sup>1</sup>H} (CD<sub>2</sub>Cl<sub>2</sub>, 121 MHz): δ 23.85 (d, P<sub>(carbonyl)</sub>), 173.53 (t, P<sub>(central)</sub>). <sup>27</sup>Al{<sup>1</sup>H} (104 MHz, CD<sub>2</sub>Cl<sub>2</sub>): δ 107.05 (s).

#### Synthesis of [(PPh<sub>3</sub>)<sub>2</sub>C-P(<sup>t</sup>Bu)Cl][Cl], [1-P(<sup>t</sup>Bu)Cl][Cl]

A benzene solution of (PPh<sub>3</sub>)<sub>2</sub>C 0.10 g (0.19 mmol) was added to a toluene solution (20 mL) containing 3.0 equivalents of <sup>t</sup>BuPCl<sub>2</sub>. The reaction was stirred overnight and it resulted in the formation of white precipitate. The solution was filtered off and white precipitate was washed with toluene twice and finally with n-hexane and dried in vacuo to yield [1-P(<sup>t</sup>Bu)Cl][Cl] as a white solid. Yield: 0.11 g (90 %). <sup>1</sup>H NMR (400 MHz, CDCl<sub>3</sub>): δ 7.40-7.69 (m, 30H, Ph), 0.57 (d, 9H, <sup>3</sup>J<sub>PH</sub> = 15.6 Hz, CCH<sub>3</sub>). <sup>13</sup>C{<sup>1</sup>H} (CD<sub>2</sub>Cl<sub>2</sub>, 100.6 MHz): δ 27.94 (d, <sup>2</sup>J<sub>P(central)C</sub> = 33.6 Hz, CCH<sub>3</sub>), 40.40 (dt, <sup>1</sup>J<sub>P(central)C</sub> = 72.0 Hz, <sup>3</sup>J<sub>P(central)C</sub> = 11.2 Hz, CCH<sub>3</sub>), 124.40 (br m, *ipso*-C, Ph<sub>(carbonyl)</sub>), 129.11 (virtual triplet, *o*-C, Ph<sub>(carbonyl)</sub>), 133.72 (s, *p*-C, Ph<sub>(carbonyl)</sub>), 134.60 (virtual triplet, *m*-C, Ph<sub>(carbonyl)</sub>). <sup>31</sup>P{<sup>1</sup>H} (CD<sub>2</sub>Cl<sub>2</sub>, 202 MHz): δ 23.42 (multiplet – a set of second order doublets, P<sub>(carbonyl)</sub>), 131.55 (second order triplet, P<sub>(central)</sub>). ES-MS Calculated for [C<sub>41</sub>H<sub>39</sub>ClP<sub>3</sub>]<sup>+</sup> (1-P(<sup>t</sup>Bu)Cl)<sup>+</sup>: m/z 659.1953. Found: 659.1955.

#### Synthesis of [{C<sub>6</sub>H<sub>4</sub>(MeN)<sub>2</sub>C}<sub>2</sub>C-PCl<sub>2</sub>][X], [2-PCl<sub>2</sub>][X] (X = Cl<sup>-</sup>, SbF<sub>6</sub><sup>-</sup> or BAR<sup>Cl</sup><sub>4</sub>)

The chloride salt of this compound was synthesized by adding 80 mL of benzene solution of 0.10 g (0.33 mmol) of {C<sub>6</sub>H<sub>4</sub>(MeN)<sub>2</sub>C}<sub>2</sub>C (**2**) to 2.0 equivalents of MeN(PCl<sub>2</sub>)<sub>2</sub>. The reaction was stirred overnight followed by filtration. The resulting light - yellow solid was dried under vacuum to yield 0.14 g (98%) of [2-PCl<sub>2</sub>][Cl]. The most adequate counterion for crystallization of this species was found to be SbF<sub>6</sub><sup>-</sup> which was quantitatively exchanged with the chloride anion by the addition of 1 equiv of NaSbF<sub>6</sub> to a DCM solution containing [2-PCl<sub>2</sub>][Cl] followed by layering with n-hexane ([2-PCl<sub>2</sub>][SbF<sub>6</sub>]).

[2-PCl<sub>2</sub>][Cl]: <sup>31</sup>P{<sup>1</sup>H} (CD<sub>2</sub>Cl<sub>2</sub>, 160 MHz): δ 159.99 (s). ES-MS Calculated for [C<sub>19</sub>H<sub>20</sub>Cl<sub>2</sub>N<sub>4</sub>P]<sup>+</sup> (2-PCl<sub>2</sub>)<sup>+</sup>: m/z 405.0803. Found: 405.0804. Note: Due to surprisingly high insolubility of [2-PCl<sub>2</sub>][X] (X = Cl<sup>-</sup> and SbF<sub>6</sub><sup>-</sup>) in common organic solvents (C<sub>6</sub>D<sub>6</sub>, CD<sub>2</sub>Cl<sub>2</sub>, CD<sub>3</sub>CN,) we quantitatively converted [2-PCl<sub>2</sub>][Cl] to [2-PCl<sub>2</sub>][BAR<sup>Cl</sup><sub>4</sub>] (Ar<sup>Cl</sup> = 3,5-Cl<sub>2</sub>-C<sub>6</sub>H<sub>3</sub>). This conversion was achieved by addition of 1.0 equivalent of NaBAR<sup>Cl</sup><sub>4</sub> to the THF solution of [2-PCl<sub>2</sub>][Cl] followed by precipitation with n-pentane, and subsequently filtered and dried in vacuo to yield [2-PCl<sub>2</sub>][BAR<sup>Cl</sup><sub>4</sub>] as a yellow solid. <sup>1</sup>H NMR (400 MHz, CD<sub>2</sub>Cl<sub>2</sub>): δ 7.38-7.52 (m, 8H, Ph<sub>(carbonyl)</sub>), 6.80-6.94 (m, 12H, Ph<sub>(BARCl4)</sub>), 3.68 (s, 12H, NCH<sub>3</sub>). <sup>11</sup>B{<sup>1</sup>H} (128 MHz, CD<sub>2</sub>Cl<sub>2</sub>): δ -7.69 (s). <sup>13</sup>C{<sup>1</sup>H} (100 MHz, CD<sub>2</sub>Cl<sub>2</sub>): δ 32.8 (s, NCH<sub>3</sub>), 111.8 (s, CH arom.), 122.9 (s, *p*-C, BAR<sup>Cl</sup><sub>4</sub>), 127.3 (br s, C arom.), 132.0 (s, *m*-C, BAR<sup>Cl</sup><sub>4</sub>), 132.9 (q, <sup>2</sup>J<sub>CB</sub> = 4 Hz, *o*-C, BAR<sup>Cl</sup><sub>4</sub>), 164.7 (q, <sup>1</sup>J<sub>CB</sub> = 49 Hz, *ipso*-C, BAR<sup>Cl</sup><sub>4</sub>). Signals that correspond to the NCN and CCC resonances were not observed in the <sup>13</sup>C{<sup>1</sup>H} Spectrum.

### Crystallographic methods

Single crystals were mounted on quartz fiber and the X-ray intensity data were collected at 103(2) K on a Bruker X8 APEX system, using Mo K $\alpha$  radiation, with the SMART suite of programs.<sup>S2</sup> Data were processed and corrected for Lorentz and polarization effects with SAINT<sup>S3</sup> and for absorption effects with SABADS.<sup>S4</sup> Structural solution and refinement were carried out with the SHELXTL suite of programs.<sup>S5</sup> The structure was solved by direct method and refined for all data by full-matrix least-squares methods on  $F^2$ . All non-hydrogen atoms were subjected to anisotropic refinement. The hydrogen atoms were generated geometrically and allowed to ride on their respective parent atoms; they were assigned appropriate isotropic thermal parameters.

Crystallographic data for [1-PCl<sub>2</sub>][AlCl<sub>4</sub>]: C<sub>37</sub>H<sub>30</sub>AlCl<sub>6</sub>P<sub>3</sub>, M<sub>r</sub> 807.20, triclinic, P-1, a = 10.7482(3), b = 11.7146(3) Å, and c = 16.2326(5) Å,  $\alpha$  = 108.1778(13)°,  $\beta$  = 100.8287(13)°, and  $\gamma$  = 99.8863(13)°, 1848.28(9) Å<sup>3</sup>, Z = 2,  $\rho_c$  = 1.450 gcm<sup>-3</sup>, T = 103(2) K,  $\lambda$  = 0.71073 Å; 54649 reflections collected, 11898 independent [R(int) = 0.0370], which were used in all calculations; R1 = 0.0326, wR2 = 0.0786 for I > 2 $\sigma$ (I), and R1 = 0.0433, wR2 = 0.0845 for all unique reflections; max and min residual electron densities 1.034 eÅ<sup>-3</sup> and -0.886 eÅ<sup>-3</sup>. CCDC 1058665.

Crystallographic data for [2-PCl<sub>2</sub>][SbF<sub>6</sub>]: C<sub>19</sub>H<sub>20</sub>Cl<sub>2</sub>F<sub>6</sub>N<sub>4</sub>PSb, M<sub>r</sub> 642.01, orthorhombic, P<sub>bca</sub>, a = 11.6300(9), b = 19.1931(14), and c = 21.1940(13) Å,  $\alpha$  = 90,  $\beta$  = 90, and  $\gamma$  = 90°, V = 4730.8(6) Å<sup>3</sup>, Z = 8,  $\rho_c$  = 1.803 gcm<sup>-3</sup>, T = 103(2) K,  $\lambda$  = 0.71073 Å; 69640 reflections collected, 4854 independent [R<sub>int</sub> = 11.68 %], which were used in all calculations; R1 = 0.0640, wR2 = 0.1577 for I > 2 $\sigma$ (I), and R1 = 0.1188, wR2 = 0.2044 for all unique reflections; max and min residual electron densities 1.703 e<sup>-</sup>/Å<sup>3</sup> and - 1.035 e<sup>-</sup>/Å<sup>3</sup>. CCDC 1058666.

### Computational details

All quantum chemical calculations were performed with the Gaussian program package<sup>S6</sup> at the B3LYP/6-31G(d) level. Frequency calculations performed on the optimized structures revealed absence of imaginary frequency for the stable species, and a single imaginary frequency for each transition state. Intrinsic reaction coordinate calculations confirmed that the optimized transition states connect the structures of interest. Analysis of electron density and its Laplacian in the bond critical points and computation of delocalization index were performed with the AIMAll program package.<sup>S7</sup>

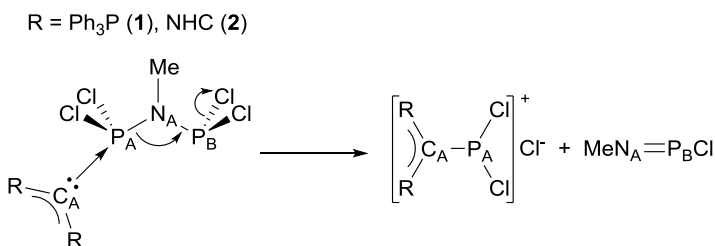

Table S1. Activation energy values.

| L | E <sub>a</sub> - kJ/mol (kcal/mol) |
|---|------------------------------------|
| 1 | 54 (12.9)                          |
| 2 | 44 (10.4)                          |

Table S2. Change in various bond distances (r), their electron densities ( $\rho_{BCP}$ ), Laplacians ( $\nabla^2\rho_{BCP}$ ) and delocalization indexes (DI) as **1** is approaching P<sub>A</sub> of MeN(PCl<sub>2</sub>)<sub>2</sub>. Values highlighted in green are for the transition state while those ones in orange are for the final product(s).

| P <sub>A</sub> -C <sub>A</sub> |              |                      |      | P <sub>A</sub> -N <sub>A</sub> |              |                      |      | P <sub>B</sub> -N <sub>A</sub> |              |                      |      |
|--------------------------------|--------------|----------------------|------|--------------------------------|--------------|----------------------|------|--------------------------------|--------------|----------------------|------|
| r                              | $\rho_{BCP}$ | $\nabla^2\rho_{BCP}$ | DI   | R                              | $\rho_{BCP}$ | $\nabla^2\rho_{BCP}$ | DI   | r                              | $\rho_{BCP}$ | $\nabla^2\rho_{BCP}$ | DI   |
| 1.845                          | 0.152        | -0.157               | 0.93 | /                              | /            | /                    | /    | 1.534                          | 0.208        | 1.236                | 1.58 |
| 2.071                          | 0.105        | -0.097               | 0.77 | 2.254                          | 0.066        | 0.060                | 0.48 | 1.608                          | 0.190        | 0.798                | 1.09 |
| 2.100                          | 0.100        | -0.074               | 0.73 | 2.179                          | 0.075        | 0.044                | 0.53 | 1.616                          | 0.188        | 0.758                | 1.07 |
| 2.200                          | 0.082        | -0.017               | 0.63 | 2.017                          | 0.100        | -0.030               | 0.65 | 1.640                          | 0.181        | 0.658                | 1.00 |
| 2.300                          | 0.068        | 0.018                | 0.54 | 1.933                          | 0.115        | -0.068               | 0.70 | 1.655                          | 0.177        | 0.592                | 0.97 |
| 2.400                          | 0.056        | 0.037                | 0.47 | 1.882                          | 0.124        | -0.044               | 0.73 | 1.666                          | 0.174        | 0.551                | 0.95 |
| 2.500                          | 0.047        | 0.047                | 0.40 | 1.848                          | 0.130        | 0.006                | 0.75 | 1.675                          | 0.172        | 0.515                | 0.93 |
| 3.000                          | 0.020        | 0.039                | 0.18 | 1.770                          | 0.147        | 0.203                | 0.81 | 1.698                          | 0.165        | 0.429                | 0.89 |
| 3.500                          | 0.009        | 0.020                | 0.08 | 1.744                          | 0.153        | 0.282                | 0.83 | 1.708                          | 0.162        | 0.394                | 0.87 |
| 4.000                          | 0.004        | 0.010                | 0.03 | 1.733                          | 0.155        | 0.316                | 0.84 | 1.713                          | 0.161        | 0.380                | 0.86 |
| $\infty$                       | /            | /                    | /    | 1.720                          | 0.159        | 0.358                | 0.85 | 1.720                          | 0.159        | 0.358                | 0.85 |

Table S3. Change in various bond distances (r), their electron densities ( $\rho_{BCP}$ ), Laplacians ( $\nabla^2\rho_{BCP}$ ) and delocalization indexes (DI) as **2** is approaching P<sub>A</sub> of MeN(PCl<sub>2</sub>)<sub>2</sub>. Values highlighted in green are for the transition state while those ones in orange are for the final product(s).

| P <sub>A</sub> -C <sub>A</sub> |              |                      |      | P <sub>A</sub> -N <sub>A</sub> |              |                      |      | P <sub>B</sub> -N <sub>A</sub> |              |                      |      |
|--------------------------------|--------------|----------------------|------|--------------------------------|--------------|----------------------|------|--------------------------------|--------------|----------------------|------|
| r                              | $\rho_{BCP}$ | $\nabla^2\rho_{BCP}$ | DI   | R                              | $\rho_{BCP}$ | $\nabla^2\rho_{BCP}$ | DI   | r                              | $\rho_{BCP}$ | $\nabla^2\rho_{BCP}$ | DI   |
| 1.860                          | 0.152        | -0.199               | 0.83 | /                              | /            | /                    | /    | 1.534                          | 0.208        | 1.236                | 1.58 |
| 2.008                          | 0.119        | -0.154               | 0.73 | 2.264                          | 0.065        | 0.061                | 0.47 | 1.608                          | 0.190        | 0.791                | 1.09 |
| 2.100                          | 0.100        | -0.077               | 0.64 | 2.067                          | 0.092        | -0.002               | 0.61 | 1.633                          | 0.183        | 0.687                | 1.02 |
| 2.200                          | 0.083        | -0.021               | 0.56 | 1.966                          | 0.109        | -0.058               | 0.68 | 1.649                          | 0.179        | 0.616                | 0.98 |
| 2.300                          | 0.069        | 0.013                | 0.49 | 1.905                          | 0.120        | -0.062               | 0.72 | 1.662                          | 0.175        | 0.567                | 0.96 |
| 2.400                          | 0.057        | 0.035                | 0.42 | 1.863                          | 0.128        | -0.018               | 0.74 | 1.671                          | 0.173        | 0.530                | 0.94 |
| 2.500                          | 0.047        | 0.045                | 0.36 | 1.833                          | 0.133        | 0.038                | 0.76 | 1.678                          | 0.171        | 0.502                | 0.92 |
| 3.000                          | 0.019        | 0.037                | 0.16 | 1.762                          | 0.148        | 0.228                | 0.81 | 1.700                          | 0.164        | 0.423                | 0.89 |
| 3.500                          | 0.008        | 0.018                | 0.07 | 1.737                          | 0.154        | 0.305                | 0.83 | 1.710                          | 0.161        | 0.389                | 0.87 |
| 4.000                          | /            | /                    | 0.02 | 1.720                          | 0.159        | 0.359                | 0.85 | 1.725                          | 0.157        | 0.340                | 0.85 |
| $\infty$                       | /            | /                    | /    | 1.720                          | 0.159        | 0.358                | 0.85 | 1.720                          | 0.159        | 0.358                | 0.85 |

Optimized structures for:

- 1

| -----       |        |        |             |           |           | 19 | 6 | 0 | -2.486739 | -3.317007 | 2.851119  |
|-------------|--------|--------|-------------|-----------|-----------|----|---|---|-----------|-----------|-----------|
| Center      | Atomic | Atomic | Coordinates |           |           | 20 | 6 | 0 | -2.861848 | -3.493522 | 1.518585  |
| (Angstroms) |        |        | X           | Y         | Z         | 21 | 6 | 0 | -2.629592 | -2.482808 | 0.583945  |
| Number      | Number | Type   |             |           |           | 22 | 1 | 0 | -1.156175 | -0.196748 | 2.630955  |
| -----       |        |        |             |           |           | 23 | 1 | 0 | -1.572411 | -1.981224 | 4.278995  |
| 1           | 6      | 0      | 0.003694    | -0.015597 | -0.855562 | 24 | 1 | 0 | -2.668918 | -4.103742 | 3.578705  |
| 2           | 15     | 0      | 1.547070    | -0.016637 | -0.284834 | 25 | 1 | 0 | -3.338366 | -4.418597 | 1.203929  |
| 3           | 15     | 0      | -1.538479   | -0.000859 | -0.284539 | 26 | 1 | 0 | -2.926192 | -2.631980 | -0.449790 |
| 4           | 6      | 0      | -2.127918   | 1.590707  | 0.480782  | 27 | 6 | 0 | -4.113287 | -0.170383 | -1.512658 |
| 5           | 6      | 0      | -2.723388   | -0.259902 | -1.679485 | 28 | 6 | 0 | -4.968610 | -0.366442 | -2.597067 |
| 6           | 6      | 0      | -2.022033   | -1.278457 | 0.969583  | 29 | 6 | 0 | -4.443879 | -0.649098 | -3.860615 |
| 7           | 6      | 0      | -3.205804   | 1.674837  | 0.375090  | 30 | 6 | 0 | -3.061608 | -0.733427 | -4.034699 |
| 8           | 6      | 0      | -3.611150   | 2.910667  | 1.883761  | 31 | 6 | 0 | -2.205426 | -0.538995 | -2.949243 |
| 9           | 6      | 0      | -2.946817   | 4.077763  | 1.502984  | 32 | 1 | 0 | -4.534488 | 0.055977  | -0.537419 |
| 10          | 6      | 0      | -1.872186   | 4.004171  | 0.614191  | 33 | 1 | 0 | -6.044100 | -0.294817 | -2.456398 |
| 11          | 6      | 0      | -1.465035   | 2.768687  | 0.315205  | 34 | 1 | 0 | -5.111240 | -0.798922 | -4.705580 |
| 12          | 1      | 0      | -3.721698   | 0.773701  | 1.693699  | 35 | 1 | 0 | -2.648155 | -0.948864 | -5.016810 |
| 13          | 1      | 0      | -4.443264   | 2.959738  | 2.581697  | 36 | 1 | 0 | -1.125689 | -0.590785 | -3.061297 |
| 14          | 1      | 0      | -3.262519   | 5.039058  | 1.900300  | 37 | 6 | 0 | 2.539906  | 1.407881  | -0.934111 |
| 15          | 1      | 0      | -1.348887   | 4.908950  | 0.315205  | 38 | 6 | 0 | 1.846643  | 0.046458  | 1.544647  |
| 16          | 1      | 0      | -0.622272   | 2.701850  | -0.573617 | 39 | 6 | 0 | 2.510390  | -1.499077 | -0.846819 |
| 17          | 6      | 0      | -1.640066   | -1.115340 | 2.311735  | 40 | 6 | 0 | 3.706180  | 1.881725  | -0.315149 |
| 18          | 6      | 0      | -1.873255   | -2.125498 | 3.244566  | 41 | 6 | 0 | 4.423187  | 2.942311  | -0.873112 |

|    |   |   |          |           |           |    |   |   |          |           |           |
|----|---|---|----------|-----------|-----------|----|---|---|----------|-----------|-----------|
| 42 | 6 | 0 | 3.984466 | 3.539119  | -2.056239 | 57 | 1 | 0 | 2.068823 | 0.178310  | 5.435928  |
| 43 | 6 | 0 | 2.821864 | 3.076147  | -2.676392 | 58 | 1 | 0 | 1.472253 | 2.223594  | 4.148858  |
| 44 | 6 | 0 | 2.102690 | 2.019618  | -2.116975 | 59 | 1 | 0 | 1.317949 | 2.138941  | 1.686654  |
| 45 | 1 | 0 | 4.048529 | 1.439591  | 0.616240  | 60 | 6 | 0 | 3.901630 | -1.608019 | -0.700134 |
| 46 | 1 | 0 | 5.321051 | 3.305259  | -0.379237 | 61 | 6 | 0 | 4.571352 | -2.749130 | -1.141730 |
| 47 | 1 | 0 | 4.542848 | 4.365116  | -2.489305 | 62 | 6 | 0 | 3.858985 | -3.792906 | -1.737985 |
| 48 | 1 | 0 | 2.472297 | 3.540885  | -3.594888 | 63 | 6 | 0 | 2.475947 | -3.689523 | -1.891820 |
| 49 | 1 | 0 | 1.186118 | 1.659897  | -2.577067 | 64 | 6 | 0 | 1.806169 | -2.546879 | -1.449866 |
| 50 | 6 | 0 | 2.176512 | -1.100584 | 2.280441  | 65 | 1 | 0 | 4.469711 | -0.801265 | -0.246466 |
| 51 | 6 | 0 | 2.255535 | -1.052608 | 3.674389  | 66 | 1 | 0 | 5.649600 | -2.821992 | -1.024352 |
| 52 | 6 | 0 | 2.004526 | 0.140949  | 4.351526  | 67 | 1 | 0 | 4.382525 | -4.680472 | -2.084226 |
| 53 | 6 | 0 | 1.669173 | 1.289654  | 3.628695  | 68 | 1 | 0 | 1.917318 | -4.496806 | -2.358768 |
| 54 | 6 | 0 | 1.587841 | 1.242084  | 2.237582  | 69 | 1 | 0 | 0.731429 | -2.441046 | -1.570981 |
| 55 | 1 | 0 | 2.372035 | -2.035948 | 1.765622  |    |   |   |          |           |           |
| 56 | 1 | 0 | 2.514721 | -1.950652 | 4.229341  |    |   |   |          |           |           |

- MeN(PCl<sub>2</sub>)<sub>2</sub>.

| Center Number | Atomic Number | Atomic Type | Coordinates (Angstroms) |           |           |
|---------------|---------------|-------------|-------------------------|-----------|-----------|
|               |               |             | X                       | Y         | Z         |
| 1             | 6             | 0           | 0.000006                | 0.030210  | 1.692252  |
| 2             | 7             | 0           | 0.000001                | -0.047106 | 0.214801  |
| 3             | 15            | 0           | 1.415986                | -0.019267 | -0.760955 |
| 4             | 17            | 0           | 2.529515                | -1.597606 | 0.081825  |
| 5             | 15            | 0           | -1.415981               | -0.019262 | -0.760956 |
| 6             | 17            | 0           | -2.529524               | -1.597606 | 0.081830  |
| 7             | 17            | 0           | -2.457638               | 1.615394  | 0.065232  |
| 8             | 17            | 0           | 2.457639                | 1.615390  | 0.065236  |
| 9             | 1             | 0           | 0.000075                | 1.074160  | 2.015744  |
| 10            | 1             | 0           | 0.886801                | -0.476283 | 2.077852  |
| 11            | 1             | 0           | -0.886857               | -0.476167 | 2.077852  |

Partially optimized structures as **1** is approaching P<sub>A</sub> of MeN(PCl<sub>2</sub>)<sub>2</sub>.

- r(P<sub>A</sub>-C<sub>A</sub>) = 4.000 Å

| Center Number | Atomic Number | Atomic Type | Coordinates (Angstroms) |           |           | Center Number | Atomic Number | Atomic Type | Coordinates (Angstroms) |           |           |
|---------------|---------------|-------------|-------------------------|-----------|-----------|---------------|---------------|-------------|-------------------------|-----------|-----------|
|               |               |             | X                       | Y         | Z         |               |               |             | X                       | Y         | Z         |
| 1             | 6             | 0           | 0.003896                | -3.758882 | -1.148907 | 25            | 6             | 0           | -4.829505               | 2.389599  | -3.156612 |
| 2             | 6             | 0           | -0.155782               | -2.366518 | -1.105684 | 26            | 6             | 0           | -4.979169               | 2.954033  | -1.890157 |
| 3             | 6             | 0           | 0.697634                | -1.562215 | -1.872952 | 27            | 6             | 0           | -4.007321               | 2.748724  | -0.907981 |
| 4             | 6             | 0           | 1.681133                | -2.136945 | -2.681107 | 28            | 6             | 0           | -0.169124               | 2.745305  | -0.341254 |
| 5             | 6             | 0           | 1.829724                | -3.524998 | -2.720886 | 29            | 6             | 0           | -0.120079               | 3.492567  | -1.524501 |
| 6             | 6             | 0           | 0.991066                | -4.333766 | -1.951651 | 30            | 6             | 0           | 0.995660                | 4.282866  | -1.819659 |
| 7             | 15            | 0           | -1.450140               | -1.515697 | -0.081697 | 31            | 6             | 0           | 2.069428                | 4.341513  | -0.932972 |
| 8             | 6             | 0           | -1.573715               | -2.561228 | 1.443000  | 32            | 6             | 0           | 2.024352                | 3.608851  | 0.258053  |
| 9             | 6             | 0           | -2.294407               | -3.764178 | 1.488411  | 33            | 6             | 0           | 0.915021                | 2.816691  | 0.550086  |
| 10            | 6             | 0           | -2.342029               | -4.516567 | 2.663964  | 34            | 6             | 0           | -3.036558               | -1.895162 | -0.969364 |
| 11            | 6             | 0           | -1.671350               | -4.075228 | 3.805954  | 35            | 6             | 0           | -3.071783               | -2.400965 | -2.275996 |
| 12            | 6             | 0           | -0.957596               | -2.875374 | 3.770982  | 36            | 6             | 0           | -4.291003               | -2.584837 | -2.933619 |
| 13            | 6             | 0           | -0.912082               | -2.121930 | 2.597676  | 37            | 6             | 0           | -5.488481               | -2.266446 | -2.293843 |
| 14            | 6             | 0           | -1.062861               | 0.045760  | 0.233327  | 38            | 6             | 0           | -5.464572               | -1.759689 | -0.991579 |
| 15            | 15            | 0           | -1.561388               | 1.600411  | 0.084486  | 39            | 6             | 0           | -4.248878               | -1.572484 | -0.337190 |
| 16            | 6             | 0           | -2.203086               | 2.363162  | 1.649524  | 40            | 15            | 0           | 2.839537                | -0.459147 | 0.951908  |
| 17            | 6             | 0           | -2.250967               | 3.752117  | 1.845385  | 41            | 17            | 0           | 2.902531                | 0.379068  | 2.903793  |
| 18            | 6             | 0           | -2.749717               | 4.281780  | 3.036350  | 42            | 7             | 0           | 4.457075                | -0.127870 | 0.426316  |
| 19            | 6             | 0           | -3.199303               | 3.428841  | 4.047294  | 43            | 6             | 0           | 5.675537                | -0.545950 | 1.151555  |
| 20            | 6             | 0           | -3.144374               | 2.046083  | 3.864588  | 44            | 17            | 0           | 3.020562                | -2.492446 | 1.478827  |
| 21            | 6             | 0           | -2.645943               | 1.517298  | 2.672545  | 45            | 15            | 0           | 4.454518                | 0.609305  | -1.119407 |
| 22            | 6             | 0           | -2.872131               | 1.971090  | -1.178900 | 46            | 17            | 0           | 5.773385                | 2.235727  | -0.807708 |
| 23            | 6             | 0           | -2.739533               | 1.396851  | -2.454264 | 47            | 17            | 0           | 5.765981                | -0.660863 | -2.192369 |
| 24            | 6             | 0           | -3.705473               | 1.609124  | -3.436708 | 48            | 1             | 0           | -1.891131               | 4.422621  | 1.069408  |
|               |               |             |                         |           |           | 49            | 1             | 0           | -2.780442               | 5.359133  | 3.177896  |
|               |               |             |                         |           |           | 50            | 1             | 0           | -3.582947               | 3.841760  | 4.976755  |
|               |               |             |                         |           |           | 51            | 1             | 0           | -3.482329               | 1.378087  | 4.652768  |
|               |               |             |                         |           |           | 52            | 1             | 0           | -2.574755               | 0.442262  | 2.530825  |
|               |               |             |                         |           |           | 53            | 1             | 0           | -4.141684               | 3.193749  | 0.072169  |

|    |   |   |           |           |           |    |   |   |           |           |           |
|----|---|---|-----------|-----------|-----------|----|---|---|-----------|-----------|-----------|
| 54 | 1 | 0 | -5.854856 | 3.556210  | -1.661325 | 68 | 1 | 0 | -2.147086 | -2.656552 | -2.783817 |
| 55 | 1 | 0 | -5.586244 | 2.550868  | -3.919989 | 69 | 1 | 0 | -4.301758 | -2.980001 | -3.946371 |
| 56 | 1 | 0 | -3.584884 | 1.157549  | -4.417853 | 70 | 1 | 0 | -6.436541 | -2.410934 | -2.805376 |
| 57 | 1 | 0 | -1.879449 | 0.770057  | -2.671689 | 71 | 1 | 0 | -6.393826 | -1.508208 | -0.487004 |
| 58 | 1 | 0 | 0.887178  | 2.250176  | 1.476392  | 72 | 1 | 0 | -4.239337 | -1.170648 | 0.672720  |
| 59 | 1 | 0 | 2.851497  | 3.660756  | 0.961347  | 73 | 1 | 0 | -0.632467 | -4.401130 | -0.547827 |
| 60 | 1 | 0 | 2.936229  | 4.955453  | -1.162213 | 74 | 1 | 0 | 1.108353  | -5.414223 | -1.970756 |
| 61 | 1 | 0 | 1.020060  | 4.853535  | -2.744579 | 75 | 1 | 0 | 2.599733  | -3.973633 | -3.343004 |
| 62 | 1 | 0 | -0.949992 | 3.461416  | -2.223135 | 76 | 1 | 0 | 2.332222  | -1.502235 | -3.277140 |
| 63 | 1 | 0 | -2.836110 | -4.108394 | 0.611826  | 77 | 1 | 0 | 0.586707  | -0.482802 | -1.810568 |
| 64 | 1 | 0 | -2.908996 | -5.443782 | 2.688319  | 78 | 1 | 0 | 6.491898  | 0.137129  | 0.909229  |
| 65 | 1 | 0 | -1.710065 | -4.661005 | 4.720792  | 79 | 1 | 0 | 5.486327  | -0.498396 | 2.225712  |
| 66 | 1 | 0 | -0.437082 | -2.523878 | 4.658045  | 80 | 1 | 0 | 5.951195  | -1.565506 | 0.870198  |
| 67 | 1 | 0 | -0.378457 | -1.176041 | 2.563976  |    |   |   |           |           |           |

-  $r(P_A-C_A) = 3.500 \text{ \AA}$

| Center<br>(Angstroms) | Atomic<br>Number | Atomic<br>Type | Coordinates |           |           |
|-----------------------|------------------|----------------|-------------|-----------|-----------|
|                       |                  |                | X           | Y         | Z         |
| 1                     | 6                | 0              | -2.321358   | 1.524232  | -2.551702 |
| 2                     | 6                | 0              | -2.396577   | 2.151826  | -1.297024 |
| 3                     | 6                | 0              | -3.413064   | 3.093210  | -1.079373 |
| 4                     | 6                | 0              | -4.321426   | 3.406533  | -2.093032 |
| 5                     | 6                | 0              | -4.226474   | 2.787677  | -3.339230 |
| 6                     | 6                | 0              | -3.222629   | 1.843952  | -3.566320 |
| 7                     | 15               | 0              | -1.161874   | 1.651649  | 0.002150  |
| 8                     | 6                | 0              | -0.814049   | 0.045053  | 0.141965  |
| 9                     | 15               | 0              | -1.591235   | -1.398926 | -0.060594 |
| 10                    | 6                | 0              | -3.292151   | -1.441043 | -0.809850 |
| 11                    | 6                | 0              | -3.545512   | -1.979558 | -2.078762 |
| 12                    | 6                | 0              | -4.827704   | -1.923434 | -2.631331 |
| 13                    | 6                | 0              | -5.871419   | -1.328160 | -1.923847 |
| 14                    | 6                | 0              | -5.629325   | -0.785324 | -0.659050 |
| 15                    | 6                | 0              | -4.350681   | -0.840160 | -0.108316 |
| 16                    | 6                | 0              | 0.347632    | 2.646255  | -0.396506 |
| 17                    | 6                | 0              | 0.592196    | 3.168420  | -1.673255 |
| 18                    | 6                | 0              | 1.787201    | 3.837771  | -1.950948 |
| 19                    | 6                | 0              | 2.751790    | 3.996737  | -0.956249 |
| 20                    | 6                | 0              | 2.514490    | 3.486860  | 0.323696  |
| 21                    | 6                | 0              | 1.321333    | 2.819058  | 0.601000  |
| 22                    | 6                | 0              | -1.760956   | 2.495483  | 1.546487  |
| 23                    | 6                | 0              | -1.697841   | 3.887361  | 1.721781  |
| 24                    | 6                | 0              | -2.169902   | 4.475811  | 2.895772  |
| 25                    | 6                | 0              | -2.704067   | 3.679829  | 3.912185  |
| 26                    | 6                | 0              | -2.758866   | 2.294686  | 3.751959  |
| 27                    | 6                | 0              | -2.286602   | 1.707359  | 2.576381  |
| 28                    | 6                | 0              | -1.838132   | -2.345234 | 1.514506  |
| 29                    | 6                | 0              | -2.783032   | -3.376014 | 1.639408  |
| 30                    | 6                | 0              | -2.925046   | -4.064265 | 2.845732  |
| 31                    | 6                | 0              | -2.127937   | -3.728664 | 3.941814  |
| 32                    | 6                | 0              | -1.193100   | -2.697945 | 3.829101  |
| 33                    | 6                | 0              | -1.050984   | -2.009028 | 2.623749  |
| 34                    | 6                | 0              | -0.610810   | -2.540646 | -1.143099 |
| 35                    | 6                | 0              | 0.298100    | -1.963611 | -2.039826 |
| 36                    | 6                | 0              | 1.048055    | -2.762253 | -2.904662 |
| 37                    | 6                | 0              | 0.904669    | -4.150554 | -2.874401 |
| 38                    | 6                | 0              | 0.009178    | -4.735289 | -1.976761 |

-  $r(P_A-C_A) = 3.000 \text{ \AA}$

| Center<br>(Angstroms) | Atomic<br>Number | Atomic<br>Type | Coordinates |           |           |
|-----------------------|------------------|----------------|-------------|-----------|-----------|
|                       |                  |                | X           | Y         | Z         |
| 1                     | 6                | 0              | -1.300850   | -3.953813 | -1.076933 |
| 2                     | 6                | 0              | -0.938164   | -2.601438 | -1.146410 |
| 3                     | 6                | 0              | -0.019955   | -2.195845 | -2.123863 |

|    |    |   |           |           |           |
|----|----|---|-----------|-----------|-----------|
| 39 | 6  | 0 | -0.745415 | -3.935776 | -1.116541 |
| 40 | 15 | 0 | 2.579826  | -0.573820 | 0.732397  |
| 41 | 7  | 0 | 4.302364  | -0.454027 | 0.490829  |
| 42 | 15 | 0 | 4.641958  | 0.348131  | -0.978585 |
| 43 | 17 | 0 | 5.876929  | -1.066677 | -1.964732 |
| 44 | 17 | 0 | 2.418619  | -2.653076 | 1.063674  |
| 45 | 17 | 0 | 2.475787  | 0.058541  | 2.761924  |
| 46 | 6  | 0 | 5.321896  | -1.101868 | 1.341263  |
| 47 | 17 | 0 | 6.150484  | 1.710521  | -0.375336 |
| 48 | 1  | 0 | -1.270829 | 4.514365  | 0.943603  |
| 49 | 1  | 0 | -2.114368 | 5.554306  | 3.019852  |
| 50 | 1  | 0 | -3.067176 | 4.138402  | 4.828342  |
| 51 | 1  | 0 | -3.160808 | 1.668998  | 4.544695  |
| 52 | 1  | 0 | -2.300260 | 0.627525  | 2.457667  |
| 53 | 1  | 0 | -3.506598 | 3.581537  | -0.115634 |
| 54 | 1  | 0 | -5.105825 | 4.135121  | -1.904220 |
| 55 | 1  | 0 | -4.933626 | 3.033412  | -4.127197 |
| 56 | 1  | 0 | -3.146415 | 1.348906  | -4.530841 |
| 57 | 1  | 0 | -1.558342 | 0.771380  | -2.726958 |
| 58 | 1  | 0 | 1.144174  | 2.433653  | 1.600201  |
| 59 | 1  | 0 | 3.256296  | 3.613864  | 1.107723  |
| 60 | 1  | 0 | 3.681082  | 4.516854  | -1.171997 |
| 61 | 1  | 0 | 1.959795  | 4.237723  | -2.946837 |
| 62 | 1  | 0 | -0.150042 | 3.059567  | -2.457238 |
| 63 | 1  | 0 | -3.423909 | -3.632992 | 0.800673  |
| 64 | 1  | 0 | -3.663608 | -4.857425 | 2.930287  |
| 65 | 1  | 0 | -2.240498 | -4.263909 | 4.881189  |
| 66 | 1  | 0 | -0.573323 | -2.426952 | 4.679792  |
| 67 | 1  | 0 | -0.339972 | -1.193429 | 2.534228  |
| 68 | 1  | 0 | -2.742831 | -2.448353 | -2.638909 |
| 69 | 1  | 0 | -5.008181 | -2.348047 | -3.615699 |
| 70 | 1  | 0 | -6.868702 | -1.285294 | -2.353868 |
| 71 | 1  | 0 | -6.437557 | -0.318912 | -0.101782 |
| 72 | 1  | 0 | -4.172987 | -0.411384 | 0.874531  |
| 73 | 1  | 0 | -1.427986 | -4.406217 | -0.415785 |
| 74 | 1  | 0 | -0.098675 | -5.816317 | -1.940720 |
| 75 | 1  | 0 | 1.493556  | -4.774946 | -3.541284 |
| 76 | 1  | 0 | 1.749897  | -2.301752 | -3.595425 |
| 77 | 1  | 0 | 0.419759  | -0.883558 | -2.029274 |
| 78 | 1  | 0 | 6.247312  | -0.523829 | 1.299888  |
| 79 | 1  | 0 | 4.965721  | -1.120815 | 2.372795  |
| 80 | 1  | 0 | 5.508438  | -2.122743 | 0.997606  |

|    |    |   |           |           |           |
|----|----|---|-----------|-----------|-----------|
| 4  | 6  | 0 | 0.514866  | -3.117668 | -3.024596 |
| 5  | 6  | 0 | 0.143863  | -4.461257 | -2.951663 |
| 6  | 6  | 0 | -0.761829 | -4.877280 | -1.974005 |
| 7  | 15 | 0 | -1.641416 | -1.299616 | -0.030925 |
| 8  | 6  | 0 | -2.019305 | -2.181479 | 1.556771  |
| 9  | 6  | 0 | -3.127813 | -3.033199 | 1.694686  |
| 10 | 6  | 0 | -3.378818 | -3.680694 | 2.905363  |
| 11 | 6  | 0 | -2.530225 | -3.480729 | 3.996105  |

|    |    |   |           |           |           |    |    |   |           |           |           |
|----|----|---|-----------|-----------|-----------|----|----|---|-----------|-----------|-----------|
| 12 | 6  | 0 | -1.433643 | -2.626546 | 3.871639  | 47 | 17 | 0 | 5.770405  | -1.527215 | -1.769491 |
| 13 | 6  | 0 | -1.180695 | -1.980236 | 2.660494  | 48 | 1  | 0 | -0.833568 | 4.533712  | 0.794427  |
| 14 | 6  | 0 | -0.586877 | -0.013785 | 0.123505  | 49 | 1  | 0 | -1.582808 | 5.667163  | 2.855045  |
| 15 | 15 | 0 | -0.821578 | 1.626813  | -0.041480 | 50 | 1  | 0 | -2.497600 | 4.341676  | 4.749678  |
| 16 | 6  | 0 | -1.343263 | 2.547680  | 1.488401  | 51 | 1  | 0 | -2.643437 | 1.864573  | 4.566863  |
| 17 | 6  | 0 | -1.246000 | 3.944313  | 1.608857  | 52 | 1  | 0 | -1.878582 | 0.728420  | 2.495684  |
| 18 | 6  | 0 | -1.663814 | 4.586152  | 2.775049  | 53 | 1  | 0 | -2.992397 | 3.753649  | -0.206832 |
| 19 | 6  | 0 | -2.176320 | 3.840794  | 3.840135  | 54 | 1  | 0 | -4.502660 | 4.438001  | -2.021882 |
| 20 | 6  | 0 | -2.261211 | 2.452334  | 3.736394  | 55 | 1  | 0 | -4.422541 | 3.287006  | -4.225587 |
| 21 | 6  | 0 | -1.842740 | 1.811207  | 2.568201  | 56 | 1  | 0 | -2.821379 | 1.413113  | -4.575377 |
| 22 | 6  | 0 | -2.018760 | 2.197467  | -1.349285 | 57 | 1  | 0 | -1.323371 | 0.706322  | -2.743930 |
| 23 | 6  | 0 | -2.001354 | 1.540694  | -2.590941 | 58 | 1  | 0 | 1.432932  | 2.657483  | 1.558497  |
| 24 | 6  | 0 | -2.854134 | 1.933406  | -3.621774 | 59 | 1  | 0 | 3.588570  | 3.704633  | 0.982373  |
| 25 | 6  | 0 | -3.753947 | 2.982327  | -3.424742 | 60 | 1  | 0 | 4.149675  | 4.190292  | -1.391666 |
| 26 | 6  | 0 | -3.796380 | 3.628945  | -2.190005 | 61 | 1  | 0 | 2.525730  | 3.603401  | -3.184448 |
| 27 | 6  | 0 | -2.936147 | 3.241260  | -1.160459 | 62 | 1  | 0 | 0.378601  | 2.544167  | -2.615232 |
| 28 | 6  | 0 | 0.748570  | 2.505886  | -0.485958 | 63 | 1  | 0 | -3.810784 | -3.179115 | 0.862883  |
| 29 | 6  | 0 | 1.076669  | 2.785168  | -1.820741 | 64 | 1  | 0 | -4.242567 | -4.334158 | 2.997732  |
| 30 | 6  | 0 | 2.292457  | 3.389519  | -2.144709 | 65 | 1  | 0 | -2.728070 | -3.982812 | 4.939642  |
| 31 | 6  | 0 | 3.202090  | 3.722131  | -1.139982 | 66 | 1  | 0 | -0.771323 | -2.460075 | 4.717081  |
| 32 | 6  | 0 | 2.886982  | 3.450175  | 0.192699  | 67 | 1  | 0 | -0.337881 | -1.304530 | 2.567293  |
| 33 | 6  | 0 | 1.668304  | 2.850867  | 0.517667  | 68 | 1  | 0 | -3.062766 | -2.129967 | -2.551533 |
| 34 | 6  | 0 | -3.352221 | -1.038303 | -0.711418 | 69 | 1  | 0 | -5.329064 | -1.676559 | -3.417245 |
| 35 | 6  | 0 | -3.751092 | -1.536057 | -1.959221 | 70 | 1  | 0 | -6.932290 | -0.325299 | -2.080208 |
| 36 | 6  | 0 | -5.034452 | -1.280343 | -2.448778 | 71 | 1  | 0 | -6.240826 | 0.570749  | 0.136050  |
| 37 | 6  | 0 | -5.933822 | -0.523188 | -1.699209 | 72 | 1  | 0 | -3.976817 | 0.120600  | 1.004015  |
| 38 | 6  | 0 | -5.545726 | -0.020071 | -0.454702 | 73 | 1  | 0 | -1.993403 | -4.296347 | -0.315093 |
| 39 | 6  | 0 | -4.266133 | -0.275172 | 0.034124  | 74 | 1  | 0 | -1.045530 | -5.924206 | -1.903825 |
| 40 | 15 | 0 | 2.312826  | -0.603672 | 0.617223  | 75 | 1  | 0 | 0.564947  | -5.182733 | -3.646975 |
| 41 | 17 | 0 | 2.148865  | 0.025393  | 2.652368  | 76 | 1  | 0 | 1.229340  | -2.788871 | -3.774823 |
| 42 | 7  | 0 | 4.078524  | -0.700087 | 0.551814  | 77 | 1  | 0 | 0.286990  | -1.153745 | -2.147822 |
| 43 | 6  | 0 | 4.932567  | -1.464143 | 1.481648  | 78 | 1  | 0 | 5.915915  | -0.992641 | 1.545802  |
| 44 | 17 | 0 | 1.937666  | -2.663708 | 0.923629  | 79 | 1  | 0 | 4.475105  | -1.457468 | 2.472453  |
| 45 | 15 | 0 | 4.638260  | 0.036417  | -0.872201 | 80 | 1  | 0 | 5.041763  | -2.495790 | 1.135930  |
| 46 | 17 | 0 | 6.263356  | 1.203551  | -0.150327 |    |    |   |           |           |           |

-  $r(\text{P}_A\text{-C}_A) = 2.500 \text{ \AA}$

| -----                 |                  |                |             |           |           | ----- |    |   |           |           |           |
|-----------------------|------------------|----------------|-------------|-----------|-----------|-------|----|---|-----------|-----------|-----------|
| Center<br>(Angstroms) | Atomic<br>Number | Atomic<br>Type | Coordinates |           |           |       |    |   |           |           |           |
| Number                | Number           | Type           | X           | Y         | Z         |       |    |   |           |           |           |
| 1                     | 6                | 0              | -1.301989   | 1.466507  | -2.782132 | 28    | 6  | 0 | -2.087872 | -2.094070 | 1.588679  |
| 2                     | 6                | 0              | -1.582385   | 2.077955  | -1.547969 | 29    | 6  | 0 | -3.287674 | -2.817199 | 1.708089  |
| 3                     | 6                | 0              | -2.604075   | 3.036497  | -1.497253 | 30    | 6  | 0 | -3.613868 | -3.459079 | 2.902895  |
| 4                     | 6                | 0              | -3.304401   | 3.392517  | -2.652304 | 31    | 6  | 0 | -2.751522 | -3.380959 | 3.998538  |
| 5                     | 6                | 0              | -2.993530   | 2.802017  | -3.876329 | 32    | 6  | 0 | -1.566995 | -2.651828 | 3.894358  |
| 6                     | 6                | 0              | -1.990816   | 1.832488  | -3.937406 | 33    | 6  | 0 | -1.237428 | -2.011254 | 2.698196  |
| 7                     | 15               | 0              | -0.573831   | 1.565574  | -0.071284 | 34    | 6  | 0 | -1.169063 | -2.585786 | -1.171104 |
| 8                     | 6                | 0              | -0.366665   | -0.097075 | 0.164905  | 35    | 6  | 0 | -0.228374 | -2.302709 | -2.169665 |
| 9                     | 15               | 0              | -1.620810   | -1.234807 | 0.014558  | 36    | 6  | 0 | 0.109488  | -3.261875 | -3.124709 |
| 10                    | 6                | 0              | -3.286526   | -0.686666 | -0.597071 | 37    | 6  | 0 | -0.485769 | -4.523346 | -3.088039 |
| 11                    | 6                | 0              | -3.712639   | -0.940141 | -1.908043 | 38    | 6  | 0 | -1.415827 | -4.819999 | -2.090187 |
| 12                    | 6                | 0              | -4.961782   | -0.495307 | -2.346451 | 39    | 6  | 0 | -1.756478 | -3.858523 | -1.138076 |
| 13                    | 6                | 0              | -5.800474   | 0.207583  | -1.482065 | 40    | 15 | 0 | 2.050041  | -0.618381 | 0.536086  |
| 14                    | 6                | 0              | -5.384208   | 0.468884  | -0.174575 | 41    | 7  | 0 | 3.876869  | -0.888613 | 0.607078  |
| 15                    | 6                | 0              | -4.137781   | 0.026065  | 0.264219  | 42    | 15 | 0 | 4.562866  | -0.179386 | -0.746038 |
| 16                    | 6                | 0              | 1.043884    | 2.438011  | -0.321401 | 43    | 17 | 0 | 5.641567  | -1.798060 | -1.654130 |
| 17                    | 6                | 0              | 1.567485    | 2.674572  | -1.601367 | 44    | 17 | 0 | 1.612039  | -2.688172 | 0.752614  |
| 18                    | 6                | 0              | 2.791316    | 3.325027  | -1.760793 | 45    | 17 | 0 | 1.926580  | -0.058825 | 2.614853  |
| 19                    | 6                | 0              | 3.515507    | 3.745117  | -0.644535 | 46    | 6  | 0 | 4.618104  | -1.724003 | 1.564717  |
| 20                    | 6                | 0              | 3.005202    | 3.516582  | 0.633698  | 47    | 17 | 0 | 6.257149  | 0.852120  | 0.065681  |
| 21                    | 6                | 0              | 1.776892    | 2.874527  | 0.794727  | 48    | 1  | 0 | -0.882980 | 4.499414  | 0.523558  |
| 22                    | 6                | 0              | -1.275838   | 2.536999  | 1.349443  | 49    | 1  | 0 | -1.825231 | 5.721975  | 2.448438  |
| 23                    | 6                | 0              | -1.291960   | 3.942537  | 1.362145  | 50    | 1  | 0 | -2.721369 | 4.474966  | 4.404938  |
| 24                    | 6                | 0              | -1.816448   | 4.635168  | 2.452861  | 51    | 1  | 0 | -2.653200 | 1.988248  | 4.420454  |
| 25                    | 6                | 0              | -2.318155   | 3.933926  | 3.552974  | 52    | 1  | 0 | -1.708139 | 0.762607  | 2.481714  |
| 26                    | 6                | 0              | -2.284276   | 2.539894  | 3.559895  | 53    | 1  | 0 | -2.869321 | 3.503584  | -0.556091 |
| 27                    | 6                | 0              | -1.762898   | 1.846636  | 2.464468  | 54    | 1  | 0 | -4.096771 | 4.133785  | -2.589903 |
|                       |                  |                |             |           |           | 55    | 1  | 0 | -3.534845 | 3.086493  | -4.774696 |
|                       |                  |                |             |           |           | 56    | 1  | 0 | -1.749324 | 1.353599  | -4.882680 |
|                       |                  |                |             |           |           | 57    | 1  | 0 | -0.548417 | 0.687390  | -2.836247 |
|                       |                  |                |             |           |           | 58    | 1  | 0 | 1.393113  | 2.709459  | 1.794786  |
|                       |                  |                |             |           |           | 59    | 1  | 0 | 3.563274  | 3.833673  | 1.510003  |

|    |   |   |           |           |           |    |   |   |           |           |           |
|----|---|---|-----------|-----------|-----------|----|---|---|-----------|-----------|-----------|
| 60 | 1 | 0 | 4.472915  | 4.242741  | -0.769374 | 71 | 1 | 0 | -6.032201 | 1.013896  | 0.506795  |
| 61 | 1 | 0 | 3.178557  | 3.500670  | -2.760689 | 72 | 1 | 0 | -3.831087 | 0.229874  | 1.285280  |
| 62 | 1 | 0 | 1.019724  | 2.365358  | -2.483668 | 73 | 1 | 0 | -2.468824 | -4.114618 | -0.361711 |
| 63 | 1 | 0 | -3.983742 | -2.863807 | 0.876196  | 74 | 1 | 0 | -1.873150 | -5.804928 | -2.046005 |
| 64 | 1 | 0 | -4.546201 | -4.012481 | 2.979136  | 75 | 1 | 0 | -0.218669 | -5.275181 | -3.825885 |
| 65 | 1 | 0 | -3.007382 | -3.879108 | 4.930028  | 76 | 1 | 0 | 0.848459  | -3.028028 | -3.886379 |
| 66 | 1 | 0 | -0.893131 | -2.577528 | 4.743571  | 77 | 1 | 0 | 0.259168  | -1.332753 | -2.168502 |
| 67 | 1 | 0 | -0.323474 | -1.434719 | 2.628200  | 78 | 1 | 0 | 5.565460  | -1.242150 | 1.824262  |
| 68 | 1 | 0 | -3.072407 | -1.490594 | -2.589132 | 79 | 1 | 0 | 4.024484  | -1.839788 | 2.472771  |
| 69 | 1 | 0 | -5.278163 | -0.703078 | -3.365171 | 80 | 1 | 0 | 4.819260  | -2.711136 | 1.136709  |
| 70 | 1 | 0 | -6.774100 | 0.549225  | -1.823374 |    |   |   |           |           |           |

-  $r(P_A-C_A) = 2.400 \text{ \AA}$

| -----       |        |        |           |             |           | ----- |   |   |           |           |           |
|-------------|--------|--------|-----------|-------------|-----------|-------|---|---|-----------|-----------|-----------|
| Center      |        | Atomic | Atomic    | Coordinates |           |       |   |   |           |           |           |
| (Angstroms) |        |        |           | X           | Y         | Z     |   |   |           |           |           |
| Number      | Number | Type   |           |             |           |       |   |   |           |           |           |
| -----       |        |        |           |             |           |       |   |   |           |           |           |
| 1           | 6      | 0      | -0.333114 | -0.115593   | 0.155520  | 39    | 6 | 0 | -0.701394 | -4.464680 | -3.193011 |
| 2           | 15     | 0      | -1.629712 | -1.218432   | 0.019849  | 40    | 6 | 0 | -1.627569 | -4.745492 | -2.186992 |
| 3           | 15     | 0      | -0.520227 | 1.557890    | -0.073261 | 41    | 6 | 0 | -1.903955 | -3.797572 | -1.201244 |
| 4           | 15     | 0      | 1.985199  | -0.645734   | 0.478587  | 42    | 6 | 0 | -3.289089 | -0.598912 | -0.535315 |
| 5           | 7      | 0      | 3.833972  | -0.985172   | 0.577279  | 43    | 6 | 0 | -3.755578 | -0.805658 | -1.840862 |
| 6           | 15     | 0      | 4.569185  | -0.228126   | -0.711553 | 44    | 6 | 0 | -5.001425 | -0.312842 | -2.234884 |
| 7           | 6      | 0      | 4.532086  | -1.864678   | 1.525228  | 45    | 6 | 0 | -5.797043 | 0.390740  | -1.331213 |
| 8           | 17     | 0      | 1.526039  | -2.716196   | 0.661639  | 46    | 6 | 0 | -5.341069 | 0.603716  | -0.028286 |
| 9           | 17     | 0      | 1.896423  | -0.106143   | 2.572275  | 47    | 6 | 0 | -4.097661 | 0.113534  | 0.366559  |
| 10          | 17     | 0      | 6.254455  | 0.757490    | 0.192673  | 48    | 1 | 0 | -0.796680 | 4.490784  | 0.526343  |
| 11          | 17     | 0      | 5.675817  | -1.813426   | -1.658572 | 49    | 1 | 0 | -1.670219 | 5.719993  | 2.478751  |
| 12          | 6      | 0      | 1.104836  | 2.406585    | -0.356372 | 50    | 1 | 0 | -2.511694 | 4.479776  | 4.463476  |
| 13          | 6      | 0      | 1.599797  | 2.641236    | -1.648198 | 51    | 1 | 0 | -2.458756 | 1.992783  | 4.479105  |
| 14          | 6      | 0      | 2.823606  | 3.283726    | -1.835508 | 52    | 1 | 0 | -1.582846 | 0.760015  | 2.512274  |
| 15          | 6      | 0      | 3.576700  | 3.697029    | -0.736218 | 53    | 1 | 0 | -2.803685 | 3.517608  | -0.510777 |
| 16          | 6      | 0      | 3.095011  | 3.470785    | 0.553302  | 54    | 1 | 0 | -4.051493 | 4.174418  | -2.522799 |
| 17          | 6      | 0      | 1.866260  | 2.837643    | 0.743081  | 55    | 1 | 0 | -3.532735 | 3.134234  | -4.721776 |
| 18          | 6      | 0      | -1.177243 | 2.531147    | 1.365486  | 56    | 1 | 0 | -1.770229 | 1.379993  | -4.864913 |
| 19          | 6      | 0      | -1.183531 | 3.936837    | 1.377148  | 57    | 1 | 0 | -0.549805 | 0.686486  | -2.839393 |
| 20          | 6      | 0      | -1.668645 | 4.633206    | 2.483465  | 58    | 1 | 0 | 1.505549  | 2.674871  | 1.751977  |
| 21          | 6      | 0      | -2.139745 | 3.935671    | 3.599359  | 59    | 1 | 0 | 3.676348  | 3.781669  | 1.416460  |
| 22          | 6      | 0      | -2.114611 | 2.541442    | 3.606526  | 60    | 1 | 0 | 4.534788  | 4.187344  | -0.882681 |
| 23          | 6      | 0      | -1.632586 | 1.844124    | 2.495843  | 61    | 1 | 0 | 3.188431  | 3.457551  | -2.844050 |
| 24          | 6      | 0      | -1.548689 | 2.082156    | -1.528910 | 62    | 1 | 0 | 1.030543  | 2.337089  | -2.518348 |
| 25          | 6      | 0      | -2.557471 | 3.052509    | -1.457969 | 63    | 1 | 0 | -4.017077 | -2.798101 | 0.887187  |
| 26          | 6      | 0      | -3.269565 | 3.423681    | -2.600942 | 64    | 1 | 0 | -4.584526 | -3.966307 | 2.975983  |
| 27          | 6      | 0      | -2.982823 | 2.837263    | -3.832773 | 65    | 1 | 0 | -3.021495 | -3.904477 | 4.911452  |
| 28          | 6      | 0      | -1.993040 | 1.855932    | -3.913631 | 66    | 1 | 0 | -0.875387 | -2.656212 | 4.720385  |
| 29          | 6      | 0      | -1.293075 | 1.474256    | -2.770204 | 67    | 1 | 0 | -0.296899 | -1.499981 | 2.618590  |
| 30          | 6      | 0      | -2.090940 | -2.092205   | 1.587329  | 68    | 1 | 0 | -3.150203 | -1.357061 | -2.552368 |
| 31          | 6      | 0      | -3.309010 | -2.784502   | 1.710015  | 69    | 1 | 0 | -5.348867 | -0.483717 | -3.250263 |
| 32          | 6      | 0      | -3.638582 | -3.436846   | 2.897997  | 70    | 1 | 0 | -6.768438 | 0.769228  | -1.638221 |
| 33          | 6      | 0      | -2.762580 | -3.398877   | 3.984878  | 71    | 1 | 0 | -5.955908 | 1.147206  | 0.684253  |
| 34          | 6      | 0      | -1.560459 | -2.699985   | 3.878127  | 72    | 1 | 0 | -3.761524 | 0.278747  | 1.385204  |
| 35          | 6      | 0      | -1.226326 | -2.050431   | 2.687976  | 73    | 1 | 0 | -2.614543 | -4.041092 | -0.419500 |
| 36          | 6      | 0      | -1.256102 | -2.554040   | -1.209179 | 74    | 1 | 0 | -2.132080 | -5.707764 | -2.162857 |
| 37          | 6      | 0      | -0.320123 | -2.287030   | -2.216582 | 75    | 1 | 0 | -0.484363 | -5.206232 | -3.957166 |
| 38          | 6      | 0      | -0.045645 | -3.233102   | -3.204374 | 76    | 1 | 0 | 0.691150  | -3.012917 | -3.972105 |
|             |        |        |           |             |           | 77    | 1 | 0 | 0.214214  | -1.342341 | -2.198337 |
|             |        |        |           |             |           | 78    | 1 | 0 | 4.746720  | -2.833763 | 1.062896  |
|             |        |        |           |             |           | 79    | 1 | 0 | 5.471001  | -1.402516 | 1.845819  |
|             |        |        |           |             |           | 80    | 1 | 0 | 3.902100  | -2.019042 | 2.402811  |

-  $r(P_A-C_A) = 2.300 \text{ \AA}$

| -----       |        |        |           |             |           | ----- |    |   |          |           |           |
|-------------|--------|--------|-----------|-------------|-----------|-------|----|---|----------|-----------|-----------|
| Center      |        | Atomic | Atomic    | Coordinates |           |       |    |   |          |           |           |
| (Angstroms) |        |        |           | X           | Y         | Z     |    |   |          |           |           |
| Number      | Number | Type   |           |             |           |       |    |   |          |           |           |
| -----       |        |        |           |             |           |       |    |   |          |           |           |
| 1           | 6      | 0      | -0.300697 | -0.124102   | 0.166916  | 7     | 6  | 0 | 4.514848 | -1.793435 | 1.604640  |
| 2           | 15     | 0      | -0.507592 | 1.552512    | -0.083904 | 8     | 17 | 0 | 1.509924 | -2.685111 | 0.679083  |
| 3           | 15     | 0      | -1.604981 | -1.229698   | 0.029222  | 9     | 17 | 0 | 1.844473 | -0.057304 | 2.587209  |
| 4           | 15     | 0      | 1.925627  | -0.603525   | 0.488837  | 10    | 17 | 0 | 6.265339 | 0.754930  | 0.143661  |
| 5           | 7      | 0      | 3.823524  | -0.945799   | 0.627220  | 11    | 17 | 0 | 5.638371 | -1.881301 | -1.605552 |
| 6           | 15     | 0      | 4.547617  | -0.253530   | -0.690521 | 12    | 6  | 0 | 1.113394 | 2.422034  | -0.312105 |
|             |        |        |           |             |           | 13    | 6  | 0 | 1.662341 | 2.641631  | -1.584816 |
|             |        |        |           |             |           | 14    | 6  | 0 | 2.882308 | 3.301664  | -1.728409 |
|             |        |        |           |             |           | 15    | 6  | 0 | 3.575854 | 3.750665  | -0.604286 |
|             |        |        |           |             |           | 16    | 6  | 0 | 3.037621 | 3.543726  | 0.665821  |
|             |        |        |           |             |           | 17    | 6  | 0 | 1.813662 | 2.891199  | 0.812322  |

|    |   |   |           |           |           |    |   |   |           |           |           |
|----|---|---|-----------|-----------|-----------|----|---|---|-----------|-----------|-----------|
| 18 | 6 | 0 | -1.230415 | 2.521632  | 1.322904  | 50 | 1 | 0 | -2.674197 | 4.479325  | 4.364879  |
| 19 | 6 | 0 | -1.291900 | 3.925997  | 1.304552  | 51 | 1 | 0 | -2.517345 | 1.997720  | 4.436224  |
| 20 | 6 | 0 | -1.817225 | 4.625105  | 2.390338  | 52 | 1 | 0 | -1.572615 | 0.760076  | 2.505002  |
| 21 | 6 | 0 | -2.271189 | 3.932675  | 3.516494  | 53 | 1 | 0 | -2.838982 | 3.425160  | -0.616769 |
| 22 | 6 | 0 | -2.188306 | 2.541224  | 3.554697  | 54 | 1 | 0 | -4.030504 | 4.031451  | -2.679173 |
| 23 | 6 | 0 | -1.667571 | 1.840414  | 2.463784  | 55 | 1 | 0 | -3.389935 | 3.004039  | -4.851471 |
| 24 | 6 | 0 | -1.493406 | 2.035635  | -1.580853 | 56 | 1 | 0 | -1.560816 | 1.314728  | -4.919299 |
| 25 | 6 | 0 | -2.538916 | 2.968577  | -1.552383 | 57 | 1 | 0 | -0.394900 | 0.672851  | -2.846872 |
| 26 | 6 | 0 | -3.219169 | 3.309817  | -2.723577 | 58 | 1 | 0 | 1.411228  | 2.739451  | 1.806811  |
| 27 | 6 | 0 | -2.864202 | 2.730073  | -3.940735 | 59 | 1 | 0 | 3.572182  | 3.882865  | 1.548318  |
| 28 | 6 | 0 | -1.837171 | 1.785244  | -3.979521 | 60 | 1 | 0 | 4.532113  | 4.253149  | -0.716797 |
| 29 | 6 | 0 | -1.167844 | 1.433409  | -2.808588 | 61 | 1 | 0 | 3.291724  | 3.459714  | -2.722184 |
| 30 | 6 | 0 | -2.085957 | -2.092417 | 1.595174  | 62 | 1 | 0 | 1.140312  | 2.309566  | -2.473851 |
| 31 | 6 | 0 | -3.313633 | -2.770130 | 1.704839  | 63 | 1 | 0 | -4.013750 | -2.773833 | 0.875221  |
| 32 | 6 | 0 | -3.662822 | -3.419428 | 2.888648  | 64 | 1 | 0 | -4.615666 | -3.937664 | 2.956572  |
| 33 | 6 | 0 | -2.796996 | -3.393110 | 3.984010  | 65 | 1 | 0 | -3.070658 | -3.896980 | 4.907239  |
| 34 | 6 | 0 | -1.586232 | -2.707527 | 3.890445  | 66 | 1 | 0 | -0.909417 | -2.672129 | 4.739653  |
| 35 | 6 | 0 | -1.231845 | -2.060650 | 2.704693  | 67 | 1 | 0 | -0.295198 | -1.521244 | 2.648087  |
| 36 | 6 | 0 | -1.234441 | -2.566981 | -1.197804 | 68 | 1 | 0 | -3.073772 | -1.297026 | -2.568805 |
| 37 | 6 | 0 | -0.303459 | -2.302644 | -2.210673 | 69 | 1 | 0 | -5.248624 | -0.387594 | -3.292231 |
| 38 | 6 | 0 | -0.031666 | -3.252601 | -3.195131 | 70 | 1 | 0 | -6.691917 | 0.839591  | -1.680892 |
| 39 | 6 | 0 | -0.685266 | -4.485186 | -3.175320 | 71 | 1 | 0 | -5.925601 | 1.155744  | 0.666348  |
| 40 | 6 | 0 | -1.606216 | -4.763087 | -2.163867 | 72 | 1 | 0 | -3.754609 | 0.252366  | 1.392595  |
| 41 | 6 | 0 | -1.879990 | -3.811574 | -1.180913 | 73 | 1 | 0 | -2.584876 | -4.054949 | -0.393972 |
| 42 | 6 | 0 | -3.248031 | -0.583377 | -0.538561 | 74 | 1 | 0 | -2.108087 | -5.726477 | -2.132333 |
| 43 | 6 | 0 | -3.689159 | -0.756745 | -1.857789 | 75 | 1 | 0 | -0.469620 | -5.230135 | -3.936483 |
| 44 | 6 | 0 | -4.921547 | -0.243333 | -2.266134 | 76 | 1 | 0 | 0.702839  | -3.035026 | -3.965664 |
| 45 | 6 | 0 | -5.730275 | 0.445759  | -1.362736 | 77 | 1 | 0 | 0.232103  | -1.358832 | -2.199313 |
| 46 | 6 | 0 | -5.300296 | 0.624133  | -0.045979 | 78 | 1 | 0 | 4.731359  | -2.778960 | 1.177901  |
| 47 | 6 | 0 | -4.069527 | 0.114257  | 0.363517  | 79 | 1 | 0 | 5.454141  | -1.324113 | 1.915800  |
| 48 | 1 | 0 | -0.915626 | 4.477098  | 0.447275  | 80 | 1 | 0 | 3.880580  | -1.918181 | 2.484442  |
| 49 | 1 | 0 | -1.862361 | 5.710549  | 2.362171  |    |   |   |           |           |           |

-  $r(P_A-C_A) = 2.200 \text{ \AA}$

| Center<br>(Angstroms) |                  |                | Coordinates |           |           |    |   |   |           |           |           |
|-----------------------|------------------|----------------|-------------|-----------|-----------|----|---|---|-----------|-----------|-----------|
| Number                | Atomic<br>Number | Atomic<br>Type | X           | Y         | Z         |    |   |   |           |           |           |
| 1                     | 6                | 0              | -0.281376   | -0.134672 | 0.152709  | 32 | 6 | 0 | -3.697644 | -3.380706 | 2.889850  |
| 2                     | 15               | 0              | -0.480049   | 1.554447  | -0.090494 | 33 | 6 | 0 | -2.824260 | -3.384548 | 3.979525  |
| 3                     | 15               | 0              | -1.610539   | -1.227172 | 0.030046  | 34 | 6 | 0 | -1.596968 | -2.729712 | 3.882846  |
| 4                     | 15               | 0              | 1.847427    | -0.603491 | 0.450038  | 35 | 6 | 0 | -1.233139 | -2.083461 | 2.699601  |
| 5                     | 7                | 0              | 3.818587    | -0.993452 | 0.621457  | 36 | 6 | 0 | -1.282451 | -2.560953 | -1.210378 |
| 6                     | 15               | 0              | 4.559424    | -0.306350 | -0.669852 | 37 | 6 | 0 | -0.372652 | -2.305632 | -2.244712 |
| 7                     | 6                | 0              | 4.487691    | -1.815839 | 1.630281  | 38 | 6 | 0 | -0.138507 | -3.255949 | -3.238210 |
| 8                     | 17               | 0              | 1.454095    | -2.691471 | 0.619167  | 39 | 6 | 0 | -0.808882 | -4.479253 | -3.206402 |
| 9                     | 17               | 0              | 1.807037    | -0.075076 | 2.560942  | 40 | 6 | 0 | -1.708801 | -4.747780 | -2.173866 |
| 10                    | 17               | 0              | 5.701229    | -1.922239 | -1.575234 | 41 | 6 | 0 | -1.945158 | -3.796253 | -1.181338 |
| 11                    | 17               | 0              | 6.270779    | 0.733995  | 0.180225  | 42 | 6 | 0 | -3.238413 | -0.532045 | -0.516958 |
| 12                    | 6                | 0              | 1.147143    | 2.408586  | -0.317914 | 43 | 6 | 0 | -3.693966 | -0.685931 | -1.833862 |
| 13                    | 6                | 0              | 1.700041    | 2.618224  | -1.590853 | 44 | 6 | 0 | -4.919298 | -0.144828 | -2.226774 |
| 14                    | 6                | 0              | 2.924341    | 3.269517  | -1.733726 | 45 | 6 | 0 | -5.706526 | 0.551878  | -1.310231 |
| 15                    | 6                | 0              | 3.617141    | 3.719943  | -0.609751 | 46 | 6 | 0 | -5.262534 | 0.709456  | 0.004436  |
| 16                    | 6                | 0              | 3.073304    | 3.525134  | 0.659711  | 47 | 6 | 0 | -4.038689 | 0.171912  | 0.399114  |
| 17                    | 6                | 0              | 1.845270    | 2.881207  | 0.806700  | 48 | 1 | 0 | -0.901125 | 4.470293  | 0.446914  |
| 18                    | 6                | 0              | -1.194288   | 2.5111729 | 1.324650  | 49 | 1 | 0 | -1.831378 | 5.695867  | 2.374011  |
| 19                    | 6                | 0              | -1.264174   | 3.915911  | 1.307672  | 50 | 1 | 0 | -2.608168 | 4.458537  | 4.386735  |
| 20                    | 6                | 0              | -1.779374   | 4.610774  | 2.400843  | 51 | 1 | 0 | -2.431219 | 1.978219  | 4.456038  |
| 21                    | 6                | 0              | -2.213354   | 3.914859  | 3.532679  | 52 | 1 | 0 | -1.504417 | 0.747672  | 2.513608  |
| 22                    | 6                | 0              | -2.119707   | 2.524105  | 3.569736  | 53 | 1 | 0 | -2.806623 | 3.430985  | -0.618999 |
| 23                    | 6                | 0              | -1.609556   | 1.826837  | 2.471705  | 54 | 1 | 0 | -3.986371 | 4.052192  | -2.683097 |
| 24                    | 6                | 0              | -1.465454   | 2.037276  | -1.584292 | 55 | 1 | 0 | -3.344889 | 3.028455  | -4.856879 |
| 25                    | 6                | 0              | -2.505389   | 2.976393  | -1.555132 | 56 | 1 | 0 | -1.525812 | 1.328404  | -4.924915 |
| 26                    | 6                | 0              | -3.179442   | 3.325745  | -2.727420 | 57 | 1 | 0 | -0.368783 | 0.674219  | -2.851907 |
| 27                    | 6                | 0              | -2.824040   | 2.747906  | -3.945402 | 58 | 1 | 0 | 1.440357  | 2.735519  | 1.800958  |
| 28                    | 6                | 0              | -1.802696   | 1.797005  | -3.984428 | 59 | 1 | 0 | 3.608064  | 3.864573  | 1.541803  |
| 29                    | 6                | 0              | -1.138698   | 1.437525  | -2.812840 | 60 | 1 | 0 | 4.578421  | 4.212544  | -0.721786 |
| 30                    | 6                | 0              | -2.095718   | -2.084498 | 1.596138  | 61 | 1 | 0 | 3.339072  | 3.417389  | -2.726721 |
| 31                    | 6                | 0              | -3.339989   | -2.731450 | 1.708740  | 62 | 1 | 0 | 1.179896  | 2.283574  | -2.479898 |
|                       |                  |                |             |           |           | 63 | 1 | 0 | -4.045151 | -2.712105 | 0.883708  |
|                       |                  |                |             |           |           | 64 | 1 | 0 | -4.662700 | -3.875383 | 2.960005  |
|                       |                  |                |             |           |           | 65 | 1 | 0 | -3.104611 | -3.888268 | 4.900766  |
|                       |                  |                |             |           |           | 66 | 1 | 0 | -0.913695 | -2.718067 | 4.727420  |
|                       |                  |                |             |           |           | 67 | 1 | 0 | -0.282500 | -1.569609 | 2.642567  |



|    |   |   |           |           |           |    |   |   |           |           |           |
|----|---|---|-----------|-----------|-----------|----|---|---|-----------|-----------|-----------|
| 68 | 1 | 0 | -3.095676 | -1.232110 | -2.554718 | 75 | 1 | 0 | -0.621735 | -5.224612 | -3.974570 |
| 69 | 1 | 0 | -5.257955 | -0.273830 | -3.251049 | 76 | 1 | 0 | 0.580949  | -3.046328 | -4.024835 |
| 70 | 1 | 0 | -6.662966 | 0.967074  | -1.616545 | 77 | 1 | 0 | 0.178404  | -1.371105 | -2.244312 |
| 71 | 1 | 0 | -5.871605 | 1.245887  | 0.727031  | 78 | 1 | 0 | 4.887709  | -2.733017 | 1.182145  |
| 72 | 1 | 0 | -3.713823 | 0.292788  | 1.427013  | 79 | 1 | 0 | 5.311682  | -1.260153 | 2.092957  |
| 73 | 1 | 0 | -2.633175 | -4.033008 | -0.377757 | 80 | 1 | 0 | 3.772586  | -2.088754 | 2.409400  |
| 74 | 1 | 0 | -2.222916 | -5.704243 | -2.132722 |    |   |   |           |           |           |

-  $r(\text{P}_A\text{-C}_A) = 2.100 \text{ \AA}$

| Center Atomic Atomic Coordinates |        |      |           |           |           |    |    |   |           |           |           |
|----------------------------------|--------|------|-----------|-----------|-----------|----|----|---|-----------|-----------|-----------|
| (Angstroms)                      |        |      |           |           |           |    |    |   |           |           |           |
| Number                           | Number | Type | X         | Y         | Z         |    |    |   |           |           |           |
| 1                                | 6      | 0    | -1.271447 | -2.075689 | 2.710887  | 39 | 6  | 0 | 3.648296  | 3.686157  | -0.529528 |
| 2                                | 6      | 0    | -2.124808 | -2.067026 | 1.600002  | 40 | 6  | 0 | 3.055438  | 3.534462  | 0.723497  |
| 3                                | 6      | 0    | -3.380079 | -2.694536 | 1.702270  | 41 | 6  | 0 | 1.816968  | 2.906186  | 0.843814  |
| 4                                | 6      | 0    | -3.758886 | -3.332866 | 2.882609  | 42 | 17 | 0 | 1.750377  | -0.060928 | 2.580313  |
| 5                                | 6      | 0    | -2.896203 | -3.344945 | 3.980723  | 43 | 7  | 0 | 3.875072  | -0.996583 | 0.659071  |
| 6                                | 6      | 0    | -1.657558 | -2.710626 | 3.893135  | 44 | 15 | 0 | 4.585960  | -0.353809 | -0.642644 |
| 7                                | 15     | 0    | -1.617504 | -1.234798 | 0.030939  | 45 | 17 | 0 | 5.779931  | -1.972857 | -1.531194 |
| 8                                | 6      | 0    | -0.282156 | -0.133015 | 0.149746  | 46 | 6  | 0 | 4.531485  | -1.786611 | 1.693421  |
| 9                                | 15     | 0    | 1.746582  | -0.575086 | 0.464066  | 47 | 17 | 0 | 6.316973  | 0.775970  | 0.129719  |
| 10                               | 17     | 0    | 1.415951  | -2.669648 | 0.632945  | 48 | 1  | 0 | -0.958376 | 4.469457  | 0.408163  |
| 11                               | 6      | 0    | -3.222303 | -0.515319 | -0.542140 | 49 | 1  | 0 | -1.919107 | 5.693583  | 2.320563  |
| 12                               | 6      | 0    | -4.030222 | 0.198402  | 0.359186  | 50 | 1  | 0 | -2.682528 | 4.459349  | 4.340182  |
| 13                               | 6      | 0    | -5.246078 | 0.739167  | -0.055485 | 51 | 1  | 0 | -2.461876 | 1.983249  | 4.431326  |
| 14                               | 6      | 0    | -5.672860 | 0.574592  | -1.374967 | 52 | 1  | 0 | -1.508557 | 0.752831  | 2.504171  |
| 15                               | 6      | 0    | -4.877263 | -0.132261 | -2.276528 | 53 | 1  | 0 | -2.820478 | 3.401286  | -0.681353 |
| 16                               | 6      | 0    | -3.659962 | -0.676619 | -1.864261 | 54 | 1  | 0 | -3.951737 | 4.013823  | -2.774445 |
| 17                               | 6      | 0    | -1.286053 | -2.577779 | -1.194215 | 55 | 1  | 0 | -3.240713 | 3.002897  | -4.932626 |
| 18                               | 6      | 0    | -0.395110 | -2.327578 | -2.246415 | 56 | 1  | 0 | -1.400377 | 1.324830  | -4.956423 |
| 19                               | 6      | 0    | -0.167221 | -3.290039 | -3.229408 | 57 | 1  | 0 | -0.286971 | 0.683253  | -2.856806 |
| 20                               | 6      | 0    | -0.824598 | -4.519357 | -3.169215 | 58 | 1  | 0 | 1.378086  | 2.788084  | 1.827055  |
| 21                               | 6      | 0    | -1.704751 | -4.782172 | -2.118513 | 59 | 1  | 0 | 3.562477  | 3.890913  | 1.615000  |
| 22                               | 6      | 0    | -1.935268 | -3.819264 | -1.135680 | 60 | 1  | 0 | 4.621463  | 4.158979  | -0.618833 |
| 23                               | 15     | 0    | -0.478556 | 1.567510  | -0.101032 | 61 | 1  | 0 | 3.446608  | 3.325333  | -2.645825 |
| 24                               | 6      | 0    | -1.222988 | 2.512885  | 1.300675  | 62 | 1  | 0 | 1.268055  | 2.221975  | -2.449626 |
| 25                               | 6      | 0    | -1.316949 | 3.915648  | 1.271020  | 63 | 1  | 0 | -4.074984 | -2.670216 | 0.868903  |
| 26                               | 6      | 0    | -1.848959 | 4.609893  | 2.356296  | 64 | 1  | 0 | -4.731568 | -3.813238 | 2.945024  |
| 27                               | 6      | 0    | -2.275258 | 3.915663  | 3.492105  | 65 | 1  | 0 | -3.193055 | -3.840460 | 4.901146  |
| 28                               | 6      | 0    | -2.157249 | 2.527157  | 3.541559  | 66 | 1  | 0 | -0.981640 | -2.706862 | 4.743524  |
| 29                               | 6      | 0    | -1.631127 | 1.829415  | 2.451482  | 67 | 1  | 0 | -0.310391 | -1.580588 | 2.663111  |
| 30                               | 6      | 0    | -1.435347 | 2.028585  | -1.615218 | 68 | 1  | 0 | -3.054799 | -1.231206 | -2.572765 |
| 31                               | 6      | 0    | -2.487782 | 2.954202  | -1.610323 | 69 | 1  | 0 | -5.203643 | -0.267378 | -3.303894 |
| 32                               | 6      | 0    | -3.134975 | 3.297656  | -2.799135 | 70 | 1  | 0 | -6.623466 | 0.991402  | -1.696643 |
| 33                               | 6      | 0    | -2.740663 | 2.726573  | -4.008395 | 71 | 1  | 0 | -5.862336 | 1.282639  | 0.655519  |
| 34                               | 6      | 0    | -1.707606 | 1.787592  | -4.022627 | 72 | 1  | 0 | -3.718733 | 0.322896  | 1.390570  |
| 35                               | 6      | 0    | -1.068902 | 1.434739  | -2.835332 | 73 | 1  | 0 | -2.605929 | -4.052560 | -0.316548 |
| 36                               | 6      | 0    | 1.157021  | 2.408019  | -0.293414 | 74 | 1  | 0 | -2.207002 | -5.743544 | -2.054506 |
| 37                               | 6      | 0    | 1.756913  | 2.577984  | -1.551467 | 75 | 1  | 0 | -0.641147 | -5.273906 | -3.929109 |
| 38                               | 6      | 0    | 2.992034  | 3.212730  | -1.666030 | 76 | 1  | 0 | 0.538533  | -3.084932 | -4.029329 |
|                                  |        |      |           |           |           | 77 | 1  | 0 | 0.147957  | -1.389154 | -2.270775 |
|                                  |        |      |           |           |           | 78 | 1  | 0 | 4.934663  | -2.719948 | 1.279911  |
|                                  |        |      |           |           |           | 79 | 1  | 0 | 5.356516  | -1.223207 | 2.147937  |
|                                  |        |      |           |           |           | 80 | 1  | 0 | 3.812208  | -2.035893 | 2.478880  |

Optimized structure of the transition state for the formation of **[1-PCl<sub>2</sub>][Cl]**.

| Center Atomic Atomic Coordinates |        |      |           |           |           |    |    |   |           |           |           |
|----------------------------------|--------|------|-----------|-----------|-----------|----|----|---|-----------|-----------|-----------|
| (Angstroms)                      |        |      |           |           |           |    |    |   |           |           |           |
| Number                           | Number | Type | X         | Y         | Z         |    |    |   |           |           |           |
| 1                                | 6      | 0    | -4.032674 | 0.227575  | 0.357210  | 9  | 6  | 0 | -0.420502 | -2.337522 | -2.249208 |
| 2                                | 6      | 0    | -3.226910 | -0.488066 | -0.544773 | 10 | 6  | 0 | -0.208656 | -3.301520 | -3.234168 |
| 3                                | 6      | 0    | -3.655606 | -0.629835 | -1.872345 | 11 | 6  | 0 | -0.889515 | -4.518272 | -3.178826 |
| 4                                | 6      | 0    | -4.860708 | -0.063101 | -2.289635 | 12 | 6  | 0 | -1.777595 | -4.767531 | -2.131478 |
| 5                                | 6      | 0    | -5.653245 | 0.647263  | -1.387957 | 13 | 6  | 0 | -1.992182 | -3.803234 | -1.146541 |
| 6                                | 6      | 0    | -5.236034 | 0.791513  | -0.063163 | 14 | 6  | 0 | -0.289745 | -0.136598 | 0.147262  |
| 7                                | 15     | 0    | -1.635107 | -1.233105 | 0.028598  | 15 | 15 | 0 | -0.473734 | 1.570541  | -0.099570 |
| 8                                | 6      | 0    | -1.319031 | -2.574386 | -1.200505 | 16 | 6  | 0 | -1.413477 | 2.033294  | -1.621334 |
|                                  |        |      |           |           |           | 17 | 6  | 0 | -2.455144 | 2.970717  | -1.628658 |
|                                  |        |      |           |           |           | 18 | 6  | 0 | -3.085662 | 3.319173  | -2.824972 |
|                                  |        |      |           |           |           | 19 | 6  | 0 | -2.684818 | 2.741035  | -4.028748 |
|                                  |        |      |           |           |           | 20 | 6  | 0 | -1.661488 | 1.791285  | -4.030743 |
|                                  |        |      |           |           |           | 21 | 6  | 0 | -1.038713 | 1.433871  | -2.836266 |

|    |    |   |           |           |           |    |   |   |           |           |           |
|----|----|---|-----------|-----------|-----------|----|---|---|-----------|-----------|-----------|
| 22 | 6  | 0 | 1.168565  | 2.396023  | -0.273209 | 52 | 1 | 0 | -1.513383 | 0.743085  | 2.499186  |
| 23 | 6  | 0 | 1.776390  | 2.578885  | -1.525717 | 53 | 1 | 0 | -2.792595 | 3.422466  | -0.703675 |
| 24 | 6  | 0 | 3.019689  | 3.200267  | -1.622760 | 54 | 1 | 0 | -3.894280 | 4.044742  | -2.810514 |
| 25 | 6  | 0 | 3.674959  | 3.647301  | -0.475059 | 55 | 1 | 0 | -3.171877 | 3.021018  | -4.958772 |
| 26 | 6  | 0 | 3.072523  | 3.484759  | 0.772151  | 56 | 1 | 0 | -1.348920 | 1.324228  | -4.960568 |
| 27 | 6  | 0 | 1.825995  | 2.870152  | 0.875761  | 57 | 1 | 0 | -0.262422 | 0.676206  | -2.848389 |
| 28 | 6  | 0 | -1.225380 | 2.507777  | 1.301966  | 58 | 1 | 0 | 1.378613  | 2.742803  | 1.854028  |
| 29 | 6  | 0 | -1.315974 | 3.910999  | 1.278555  | 59 | 1 | 0 | 3.579057  | 3.820632  | 1.671768  |
| 30 | 6  | 0 | -1.848823 | 4.601073  | 2.366052  | 60 | 1 | 0 | 4.655583  | 4.106472  | -0.550892 |
| 31 | 6  | 0 | -2.279355 | 3.902339  | 3.497449  | 61 | 1 | 0 | 3.482180  | 3.321282  | -2.597761 |
| 32 | 6  | 0 | -2.163737 | 2.513487  | 3.541014  | 62 | 1 | 0 | 1.288350  | 2.242414  | -2.431837 |
| 33 | 6  | 0 | -1.636090 | 1.819667  | 2.449266  | 63 | 1 | 0 | -4.112020 | -2.630785 | 0.869101  |
| 34 | 6  | 0 | -2.149435 | -2.061149 | 1.596510  | 64 | 1 | 0 | -4.779528 | -3.771556 | 2.942123  |
| 35 | 6  | 0 | -3.414526 | -2.669048 | 1.699964  | 65 | 1 | 0 | -3.234950 | -3.833264 | 4.892744  |
| 36 | 6  | 0 | -3.799399 | -3.306771 | 2.878644  | 66 | 1 | 0 | -1.005361 | -2.735786 | 4.732121  |
| 37 | 6  | 0 | -2.933185 | -3.338310 | 3.973664  | 67 | 1 | 0 | -0.322905 | -1.611344 | 2.656434  |
| 38 | 6  | 0 | -1.684569 | -2.724190 | 3.884490  | 68 | 1 | 0 | -3.052512 | -1.185450 | -2.581704 |
| 39 | 6  | 0 | -1.292195 | -2.089777 | 2.704045  | 69 | 1 | 0 | -5.179661 | -0.182741 | -3.321169 |
| 40 | 15 | 0 | 1.706741  | -0.586500 | 0.464587  | 70 | 1 | 0 | -6.594198 | 1.082300  | -1.713747 |
| 41 | 17 | 0 | 1.739012  | -0.105495 | 2.588961  | 71 | 1 | 0 | -5.850394 | 1.336973  | 0.647903  |
| 42 | 7  | 0 | 3.907258  | -1.036599 | 0.649322  | 72 | 1 | 0 | -3.730836 | 0.335488  | 1.393213  |
| 43 | 6  | 0 | 4.554423  | -1.838230 | 1.677443  | 73 | 1 | 0 | -2.669100 | -4.025067 | -0.329408 |
| 44 | 17 | 0 | 1.389848  | -2.681736 | 0.610060  | 74 | 1 | 0 | -2.298182 | -5.719318 | -2.071693 |
| 45 | 15 | 0 | 4.609290  | -0.367750 | -0.633026 | 75 | 1 | 0 | -0.718069 | -5.274128 | -3.940187 |
| 46 | 17 | 0 | 6.333756  | 0.794360  | 0.151250  | 76 | 1 | 0 | 0.503221  | -3.107920 | -4.031432 |
| 47 | 17 | 0 | 5.844129  | -1.953225 | -1.549863 | 77 | 1 | 0 | 0.141444  | -1.410269 | -2.269178 |
| 48 | 1  | 0 | -0.953569 | 4.468903  | 0.420009  | 78 | 1 | 0 | 4.982741  | -2.755099 | 1.251470  |
| 49 | 1  | 0 | -1.915712 | 5.685087  | 2.335578  | 79 | 1 | 0 | 5.360913  | -1.274251 | 2.164634  |
| 50 | 1  | 0 | -2.687216 | 4.442884  | 4.347205  | 80 | 1 | 0 | 3.823881  | -2.119733 | 2.442182  |
| 51 | 1  | 0 | -2.470670 | 1.966249  | 4.427895  |    |   |   |           |           |           |

Optimized structure for [1-PCI<sub>2</sub>][Cl].

| -----       |        |        |             |           |           | ----- |    |   |           |           |           |
|-------------|--------|--------|-------------|-----------|-----------|-------|----|---|-----------|-----------|-----------|
| Center      | Atomic | Atomic | Coordinates |           |           |       |    |   |           |           |           |
| (Angstroms) |        |        | X           | Y         | Z         |       |    |   |           |           |           |
| Number      | Number | Type   |             |           |           |       |    |   |           |           |           |
| -----       |        |        |             |           |           | ----- |    |   |           |           |           |
| 1           | 6      | 0      | 3.579498    | 0.192128  | -1.850252 | 31    | 6  | 0 | -2.266181 | 0.915336  | -2.446163 |
| 2           | 6      | 0      | 3.001512    | -0.459007 | -0.749274 | 32    | 6  | 0 | -3.163775 | 1.254384  | -3.458903 |
| 3           | 6      | 0      | 3.588314    | -1.639510 | -0.257500 | 33    | 6  | 0 | -4.527721 | 1.009431  | -3.302181 |
| 4           | 6      | 0      | 4.727658    | -2.158243 | -0.868044 | 34    | 6  | 0 | -4.994771 | 0.411290  | -2.130297 |
| 5           | 6      | 0      | 5.299449    | -1.504669 | -1.960164 | 35    | 6  | 0 | -4.104664 | 0.066363  | -1.114466 |
| 6           | 6      | 0      | 4.724596    | -0.330977 | -2.447599 | 36    | 6  | 0 | -1.484258 | 1.559609  | 1.060959  |
| 7           | 15     | 0      | 1.534282    | 0.222919  | 0.127570  | 37    | 6  | 0 | -1.808396 | 2.780528  | 0.450887  |
| 8           | 6      | 0      | 1.939126    | -0.133180 | 1.884133  | 38    | 6  | 0 | -1.801833 | 3.962003  | 1.192157  |
| 9           | 6      | 0      | 3.088474    | 0.416145  | 2.480724  | 39    | 6  | 0 | -1.476794 | 3.939630  | 2.548842  |
| 10          | 6      | 0      | 3.429695    | 0.079180  | 3.788983  | 40    | 6  | 0 | -1.154867 | 2.729083  | 3.164547  |
| 11          | 6      | 0      | 2.644929    | -0.827404 | 4.507284  | 41    | 6  | 0 | -1.160851 | 1.544828  | 2.428097  |
| 12          | 6      | 0      | 1.529418    | -1.408467 | 3.905964  | 42    | 17 | 0 | 0.642384  | -0.250635 | -3.737887 |
| 13          | 6      | 0      | 1.179077    | -1.068125 | 2.597041  | 43    | 17 | 0 | 0.871950  | -3.724729 | -0.047447 |
| 14          | 6      | 0      | 0.045708    | -0.523843 | -0.456906 | 44    | 1  | 0 | 3.730479  | 1.089294  | 1.920828  |
| 15          | 15     | 0      | 0.454138    | -1.827705 | -1.697360 | 45    | 1  | 0 | 4.316874  | 0.512862  | 4.241989  |
| 16          | 17     | 0      | -1.468425   | -2.543624 | -2.210640 | 46    | 1  | 0 | 2.917900  | -1.094996 | 5.524422  |
| 17          | 15     | 0      | -1.550897   | -0.013351 | 0.098517  | 47    | 1  | 0 | 0.936196  | -2.142586 | 4.443361  |
| 18          | 6      | 0      | -2.413245   | -1.160587 | 1.253103  | 48    | 1  | 0 | 0.343461  | -1.563034 | 2.116665  |
| 19          | 6      | 0      | -3.451999   | -0.679148 | 2.073486  | 49    | 1  | 0 | 2.041026  | 2.635673  | 1.890373  |
| 20          | 6      | 0      | -4.142324   | -1.547254 | 2.917346  | 50    | 1  | 0 | 2.122484  | 5.039389  | 1.380738  |
| 21          | 6      | 0      | -3.802638   | -2.902212 | 2.958210  | 51    | 1  | 0 | 1.662989  | 5.850841  | -0.924482 |
| 22          | 6      | 0      | -2.770838   | -3.381625 | 2.153076  | 52    | 1  | 0 | 1.092763  | 4.216667  | -2.715882 |
| 23          | 6      | 0      | -2.078048   | -2.519887 | 1.298808  | 53    | 1  | 0 | 1.006362  | 1.801986  | -2.219326 |
| 24          | 6      | 0      | 1.554582    | 2.042466  | -0.133507 | 54    | 1  | 0 | 3.140031  | -2.174132 | 0.570639  |
| 25          | 6      | 0      | 1.856248    | 2.966907  | 0.875777  | 55    | 1  | 0 | 5.158873  | -3.080876 | -0.491341 |
| 26          | 6      | 0      | 1.891887    | 4.332488  | 0.588451  | 56    | 1  | 0 | 6.188314  | -1.912313 | -2.434207 |
| 27          | 6      | 0      | 1.627731    | 4.787374  | -0.703343 | 57    | 1  | 0 | 5.157843  | 0.178236  | -3.303318 |
| 28          | 6      | 0      | 1.308358    | 3.872045  | -1.708322 | 58    | 1  | 0 | 3.143446  | 1.095573  | -2.253392 |
| 29          | 6      | 0      | 1.262153    | 2.506492  | -1.429187 | 59    | 1  | 0 | -3.720778 | 0.372453  | 2.061695  |
| 30          | 6      | 0      | -2.733014   | 0.325136  | -1.263662 | 60    | 1  | 0 | -4.941453 | -1.163089 | 3.545537  |
|             |        |        |             |           |           | 61    | 1  | 0 | -4.339688 | -3.577194 | 3.619385  |
|             |        |        |             |           |           | 62    | 1  | 0 | -2.491867 | -4.430976 | 2.179408  |
|             |        |        |             |           |           | 63    | 1  | 0 | -1.266786 | -2.917298 | 0.697316  |
|             |        |        |             |           |           | 64    | 1  | 0 | -2.074354 | 2.810469  | -0.599623 |
|             |        |        |             |           |           | 65    | 1  | 0 | -2.057547 | 4.899201  | 0.706300  |

|    |   |   |           |           |           |    |   |   |           |          |           |
|----|---|---|-----------|-----------|-----------|----|---|---|-----------|----------|-----------|
| 66 | 1 | 0 | -1.480411 | 4.860546  | 3.125726  | 71 | 1 | 0 | -5.223613 | 1.267737 | -4.095909 |
| 67 | 1 | 0 | -0.907725 | 2.700728  | 4.222173  | 72 | 1 | 0 | -2.783219 | 1.686482 | -4.379650 |
| 68 | 1 | 0 | -0.928088 | 0.610824  | 2.926378  | 73 | 1 | 0 | -1.204262 | 1.049775 | -2.613120 |
| 69 | 1 | 0 | -4.482320 | -0.418780 | -0.222257 |    |   |   |           |          |           |
| 70 | 1 | 0 | -6.053399 | 0.199142  | -2.008400 |    |   |   |           |          |           |

- Optimized structure for MeNPCl (monomer):

| Center Number | Atomic Number | Atomic Type | Coordinates (Angstroms) |           |           |
|---------------|---------------|-------------|-------------------------|-----------|-----------|
|               |               |             | X                       | Y         | Z         |
| 1             | 6             | 0           | 1.985732                | -0.868401 | 0.000000  |
| 2             | 7             | 0           | 1.341052                | 0.416615  | -0.000001 |
| 3             | 15            | 0           | -0.072491               | 1.013551  | 0.000000  |
| 4             | 17            | 0           | -1.573942               | -0.548323 | 0.000000  |
| 5             | 1             | 0           | 2.633592                | -0.941682 | -0.881741 |
| 6             | 1             | 0           | 2.633552                | -0.941698 | 0.881769  |
| 7             | 1             | 0           | 1.275486                | -1.704304 | -0.000023 |

Optimized structure for **2**.

| Center Number | Atomic Number | Atomic Type | Coordinates (Angstroms) |           |           |
|---------------|---------------|-------------|-------------------------|-----------|-----------|
|               |               |             | X                       | Y         | Z         |
| 1             | 6             | 0           | 4.845483                | 0.697614  | -0.793633 |
| 2             | 6             | 0           | 3.544220                | 0.449159  | -0.375682 |
| 3             | 6             | 0           | 3.253040                | -0.606569 | 0.515496  |
| 4             | 6             | 0           | 4.257487                | -1.430677 | 1.005661  |
| 5             | 6             | 0           | 5.574801                | -1.175380 | 0.587907  |
| 6             | 6             | 0           | 5.862330                | -0.133173 | -0.293872 |
| 7             | 7             | 0           | 2.344947                | 1.075471  | -0.671497 |
| 8             | 6             | 0           | 1.274534                | 0.448568  | -0.005264 |
| 9             | 7             | 0           | 1.880843                | -0.594226 | 0.728145  |
| 10            | 6             | 0           | 0.000001                | 0.864214  | -0.000021 |
| 11            | 6             | 0           | -1.274532               | 0.448568  | 0.005242  |
| 12            | 7             | 0           | -2.344934               | 1.075465  | 0.671498  |
| 13            | 6             | 0           | -3.544213               | 0.449160  | 0.375693  |
| 14            | 6             | 0           | -3.253048               | -0.606558 | -0.515500 |
| 15            | 7             | 0           | -1.880854               | -0.594217 | -0.728168 |
| 16            | 6             | 0           | -4.845470               | 0.697612  | 0.793666  |
| 17            | 6             | 0           | -5.862325               | -0.133167 | 0.293910  |
| 18            | 6             | 0           | -5.574811               | -1.175365 | -0.587885 |
| 19            | 6             | 0           | -4.257504               | -1.430659 | -1.005661 |
| 20            | 6             | 0           | -2.176351               | 2.222266  | 1.531505  |
| 21            | 6             | 0           | -1.170735               | -1.465237 | -1.633562 |
| 22            | 6             | 0           | 2.176380                | 2.222282  | -1.531492 |
| 23            | 6             | 0           | 1.170711                | -1.465259 | 1.633515  |
| 24            | 1             | 0           | 0.217808                | -0.995495 | 1.887081  |
| 25            | 1             | 0           | 0.973160                | -2.450940 | 1.191094  |
| 26            | 1             | 0           | 1.753871                | -1.604938 | 2.550536  |
| 27            | 1             | 0           | -1.753911               | -1.604905 | -2.550574 |
| 28            | 1             | 0           | -0.217838               | -0.995467 | -1.887137 |
| 29            | 1             | 0           | -0.973174               | -2.450923 | -1.191157 |
| 30            | 1             | 0           | 2.916696                | 2.992636  | -1.286478 |
| 31            | 1             | 0           | 2.280997                | 1.956863  | -2.591943 |
| 32            | 1             | 0           | 1.170021                | 2.612261  | -1.358528 |
| 33            | 1             | 0           | -2.916673               | 2.992621  | 1.286515  |
| 34            | 1             | 0           | -2.280946               | 1.956833  | 2.591955  |
| 35            | 1             | 0           | -1.169996               | 2.612248  | 1.358524  |
| 36            | 1             | 0           | 5.071537                | 1.504373  | -1.484118 |
| 37            | 1             | 0           | 6.888271                | 0.040642  | -0.605802 |
| 38            | 1             | 0           | 6.378203                | -1.806959 | 0.956209  |
| 39            | 1             | 0           | 4.036241                | -2.249398 | 1.683646  |
| 40            | 1             | 0           | -5.071512               | 1.504365  | 1.484164  |
| 41            | 1             | 0           | -6.888262               | 0.040647  | 0.605857  |
| 42            | 1             | 0           | -6.378220               | -1.806938 | -0.956183 |
| 43            | 1             | 0           | -4.036269               | -2.249373 | -1.683658 |

Partially optimized structures as **2** is approaching P<sub>A</sub> of MeN(PCl<sub>2</sub>)<sub>2</sub>.

$$- r(\text{P}_A\text{-C}_A) = 4.000 \text{ \AA}$$

| Center Number | Atomic Number | Atomic Type | Coordinates (Angstroms) |           |           |
|---------------|---------------|-------------|-------------------------|-----------|-----------|
|               |               |             | X                       | Y         | Z         |
| 1             | 6             | 0           | -6.683685               | 0.901238  | -0.560175 |
| 2             | 6             | 0           | -5.420082               | 0.453225  | -0.197519 |
| 3             | 6             | 0           | -5.159863               | -0.919877 | 0.000291  |
| 4             | 6             | 0           | -6.159445               | -1.870533 | -0.166045 |
| 5             | 6             | 0           | -7.438447               | -1.417225 | -0.527648 |
| 6             | 6             | 0           | -7.696139               | -0.059234 | -0.720223 |
| 7             | 7             | 0           | -4.229710               | 1.131021  | 0.033083  |
| 8             | 6             | 0           | -3.204778               | 0.225060  | 0.375835  |
| 9             | 7             | 0           | -3.825606               | -1.034589 | 0.356854  |
| 10            | 6             | 0           | -1.943529               | 0.474486  | 0.768247  |
| 11            | 15            | 0           | 1.474987                | -1.506587 | 0.144475  |
| 12            | 17            | 0           | 0.651328                | -2.730366 | -1.376115 |
| 13            | 6             | 0           | -3.134413               | -2.260038 | 0.684992  |
| 14            | 6             | 0           | -4.072387               | 2.565852  | 0.016494  |
| 15            | 6             | 0           | -0.892938               | 1.269819  | 0.514868  |
| 16            | 7             | 0           | 0.015953                | 1.762317  | 1.471913  |
| 17            | 6             | 0           | 1.060143                | 2.434207  | 0.860409  |
| 18            | 6             | 0           | 0.830941                | 2.379427  | -0.532900 |
| 19            | 7             | 0           | -0.354024               | 1.681915  | -0.724206 |
| 20            | 6             | 0           | 1.715852                | 2.964714  | -1.429822 |
| 21            | 6             | 0           | 2.850233                | 3.608403  | -0.904543 |

|    |    |   |           |           |           |    |   |   |           |           |           |
|----|----|---|-----------|-----------|-----------|----|---|---|-----------|-----------|-----------|
| 22 | 6  | 0 | 3.075057  | 3.664567  | 0.471597  | 39 | 1 | 0 | -0.477679 | 2.485622  | 3.395812  |
| 23 | 6  | 0 | 2.176529  | 3.078364  | 1.379778  | 40 | 1 | 0 | -0.914787 | 0.794785  | 3.025577  |
| 24 | 6  | 0 | -0.151464 | 1.565680  | 2.893052  | 41 | 1 | 0 | -3.793474 | -2.912100 | 1.267667  |
| 25 | 6  | 0 | -0.921666 | 1.338428  | -2.007263 | 42 | 1 | 0 | -2.801350 | -2.798637 | -0.211527 |
| 26 | 17 | 0 | 1.274153  | -2.834769 | 1.776156  | 43 | 1 | 0 | -2.258251 | -1.996440 | 1.282928  |
| 27 | 7  | 0 | 3.154725  | -1.651569 | -0.193693 | 44 | 1 | 0 | 2.349948  | 3.131468  | 2.450129  |
| 28 | 6  | 0 | 3.883036  | -2.933895 | -0.298610 | 45 | 1 | 0 | 3.954392  | 4.175425  | 0.853138  |
| 29 | 15 | 0 | 3.897223  | -0.095392 | -0.253405 | 46 | 1 | 0 | 3.555340  | 4.075934  | -1.585611 |
| 30 | 17 | 0 | 4.973231  | -0.241963 | -2.068998 | 47 | 1 | 0 | 1.537296  | 2.936690  | -2.500355 |
| 31 | 17 | 0 | 5.498341  | -0.371044 | 1.100923  | 48 | 1 | 0 | -5.961063 | -2.928520 | -0.025360 |
| 32 | 1  | 0 | -1.575972 | 0.473902  | -1.875776 | 49 | 1 | 0 | -8.236830 | -2.141111 | -0.663778 |
| 33 | 1  | 0 | -1.505185 | 2.164145  | -2.435477 | 50 | 1 | 0 | -8.692828 | 0.265087  | -1.005362 |
| 34 | 1  | 0 | -0.123199 | 1.074427  | -2.708962 | 51 | 1 | 0 | -6.884743 | 1.955837  | -0.722285 |
| 35 | 1  | 0 | -4.955347 | 3.040726  | 0.457907  | 52 | 1 | 0 | 4.737999  | -2.807985 | -0.965579 |
| 36 | 1  | 0 | -3.195244 | 2.824952  | 0.613571  | 53 | 1 | 0 | 4.228563  | -3.253664 | 0.687828  |
| 37 | 1  | 0 | -3.936627 | 2.956885  | -1.000737 | 54 | 1 | 0 | 3.219071  | -3.691093 | -0.720118 |
| 38 | 1  | 0 | 0.789833  | 1.232103  | 3.344348  |    |   |   |           |           |           |

-  $r(P_A-C_A) = 3.500 \text{ \AA}$

| Center<br>(Angstroms) |                  |                | Coordinates |           |           |    |    |   |           |           |           |
|-----------------------|------------------|----------------|-------------|-----------|-----------|----|----|---|-----------|-----------|-----------|
| Number                | Atomic<br>Number | Atomic<br>Type | X           | Y         | Z         |    |    |   |           |           |           |
| 1                     | 6                | 0              | 2.071686    | 4.477516  | 1.408999  | 26 | 17 | 0 | -1.335500 | -0.409144 | 2.201762  |
| 2                     | 6                | 0              | 1.839605    | 3.398787  | 0.564622  | 27 | 7  | 0 | -3.666061 | -0.290943 | 0.391532  |
| 3                     | 6                | 0              | 1.420548    | 3.590843  | -0.767923 | 28 | 6  | 0 | -4.497043 | 0.305384  | 1.458273  |
| 4                     | 6                | 0              | 1.224904    | 4.866006  | -1.285109 | 29 | 15 | 0 | -4.228887 | -1.440916 | -0.742470 |
| 5                     | 6                | 0              | 1.456374    | 5.955443  | -0.431863 | 30 | 17 | 0 | -5.909505 | -0.450506 | -1.554995 |
| 6                     | 6                | 0              | 1.870544    | 5.765286  | 0.888743  | 31 | 17 | 0 | -5.229452 | -2.821990 | 0.506051  |
| 7                     | 7                | 0              | 1.947623    | 2.027625  | 0.762172  | 32 | 1  | 0 | 4.033543  | 0.735152  | -1.235075 |
| 8                     | 6                | 0              | 1.599775    | 1.333630  | -0.407177 | 33 | 1  | 0 | 4.814222  | 0.540854  | 0.351176  |
| 9                     | 7                | 0              | 1.284506    | 2.333819  | -1.334506 | 34 | 1  | 0 | 5.458670  | -0.312543 | -1.071360 |
| 10                    | 6                | 0              | 1.449964    | -0.005080 | -0.600564 | 35 | 1  | 0 | 1.709283  | 1.921834  | 2.833741  |
| 11                    | 15               | 0              | -1.954754   | -0.054647 | 0.209025  | 36 | 1  | 0 | 1.869938  | 0.364137  | 1.987402  |
| 12                    | 17               | 0              | -1.883021   | 2.051160  | 0.199492  | 37 | 1  | 0 | 3.307027  | 1.386131  | 2.253459  |
| 13                    | 6                | 0              | 0.845988    | 2.060282  | -2.684395 | 38 | 1  | 0 | -0.052566 | -2.068669 | -0.962844 |
| 14                    | 6                | 0              | 2.232668    | 1.392657  | 2.030556  | 39 | 1  | 0 | 0.450195  | -3.783302 | -0.963475 |
| 15                    | 6                | 0              | 2.265648    | -1.061341 | -0.399135 | 40 | 1  | 0 | 0.027202  | -2.975709 | 0.569914  |
| 16                    | 7                | 0              | 1.868505    | -2.406225 | -0.306208 | 41 | 1  | 0 | -0.102964 | 2.569803  | -2.887249 |
| 17                    | 6                | 0              | 2.966832    | -3.240310 | -0.174932 | 42 | 1  | 0 | 1.590680  | 2.387798  | -3.420650 |
| 18                    | 6                | 0              | 4.116110    | -2.422686 | -0.209883 | 43 | 1  | 0 | 0.707300  | 0.979641  | -2.764742 |
| 19                    | 7                | 0              | 3.678849    | -1.111064 | -0.350366 | 44 | 1  | 0 | 2.187450  | -5.250042 | 0.003178  |
| 20                    | 6                | 0              | 5.389097    | -2.969521 | -0.108485 | 45 | 1  | 0 | 4.463847  | -6.247529 | 0.170860  |
| 21                    | 6                | 0              | 5.494072    | -4.364066 | 0.024014  | 46 | 1  | 0 | 6.478914  | -4.814701 | 0.107328  |
| 22                    | 6                | 0              | 4.357163    | -5.172192 | 0.060292  | 47 | 1  | 0 | 6.276730  | -2.344371 | -0.122000 |
| 23                    | 6                | 0              | 3.069997    | -4.619039 | -0.035397 | 48 | 1  | 0 | 0.904255  | 5.016025  | -2.311317 |
| 24                    | 6                | 0              | 0.495517    | -2.837550 | -0.413367 | 49 | 1  | 0 | 1.311827  | 6.963506  | -0.809676 |
| 25                    | 6                | 0              | 4.541651    | 0.024554  | -0.578547 | 50 | 1  | 0 | 2.045524  | 6.626847  | 1.526611  |
|                       |                  |                |             |           |           | 51 | 1  | 0 | 2.401413  | 4.333713  | 2.433278  |
|                       |                  |                |             |           |           | 52 | 1  | 0 | -5.518705 | 0.430336  | 1.093708  |
|                       |                  |                |             |           |           | 53 | 1  | 0 | -4.496669 | -0.338217 | 2.341870  |
|                       |                  |                |             |           |           | 54 | 1  | 0 | -4.095904 | 1.286821  | 1.717533  |

-  $r(P_A-C_A) = 3.000 \text{ \AA}$

| Center<br>(Angstroms) |                  |                | Coordinates |           |           |    |    |   |           |           |           |
|-----------------------|------------------|----------------|-------------|-----------|-----------|----|----|---|-----------|-----------|-----------|
| Number                | Atomic<br>Number | Atomic<br>Type | X           | Y         | Z         |    |    |   |           |           |           |
| 1                     | 6                | 0              | 2.661243    | 4.246143  | 1.356195  | 14 | 6  | 0 | 2.285795  | 1.207321  | 2.075849  |
| 2                     | 6                | 0              | 2.214364    | 3.204631  | 0.551212  | 15 | 6  | 0 | 1.876467  | -1.246359 | -0.348608 |
| 3                     | 6                | 0              | 1.810295    | 3.429813  | -0.779140 | 16 | 7  | 0 | 1.361025  | -2.551703 | -0.286175 |
| 4                     | 6                | 0              | 1.842058    | 4.702586  | -1.337983 | 17 | 6  | 0 | 2.381688  | -3.485628 | -0.190896 |
| 5                     | 6                | 0              | 2.290883    | 5.753583  | -0.526571 | 18 | 6  | 0 | 3.599187  | -2.776425 | -0.224032 |
| 6                     | 6                | 0              | 2.691931    | 5.530134  | 0.794421  | 19 | 7  | 0 | 3.282293  | -1.426736 | -0.329191 |
| 7                     | 7                | 0              | 2.068975    | 1.843908  | 0.792737  | 20 | 6  | 0 | 4.818199  | -3.439611 | -0.154904 |
| 8                     | 6                | 0              | 1.575575    | 1.195988  | -0.342521 | 21 | 6  | 0 | 4.796994  | -4.840450 | -0.057792 |
| 9                     | 7                | 0              | 1.436093    | 2.200483  | -1.299338 | 22 | 6  | 0 | 3.591354  | -5.542132 | -0.024295 |
| 10                    | 6                | 0              | 1.158002    | -0.105492 | -0.481685 | 23 | 6  | 0 | 2.359712  | -4.871223 | -0.086581 |
| 11                    | 15               | 0              | -1.757584   | 0.106700  | 0.192360  | 24 | 6  | 0 | -0.035822 | -2.872285 | -0.465807 |
| 12                    | 17               | 0              | -1.547364   | 2.212137  | 0.260246  | 25 | 6  | 0 | 4.249480  | -0.383375 | -0.583375 |
| 13                    | 6                | 0              | 0.922281    | 1.975965  | -2.633479 | 26 | 17 | 0 | -1.189638 | -0.359548 | 2.186122  |
|                       |                  |                |             |           |           | 27 | 7  | 0 | -3.501864 | 0.032734  | 0.427925  |
|                       |                  |                |             |           |           | 28 | 6  | 0 | -4.254532 | 0.653979  | 1.535215  |
|                       |                  |                |             |           |           | 29 | 15 | 0 | -4.187230 | -0.993722 | -0.741755 |
|                       |                  |                |             |           |           | 30 | 17 | 0 | -5.789904 | 0.182170  | -1.477458 |
|                       |                  |                |             |           |           | 31 | 17 | 0 | -5.304349 | -2.343972 | 0.452140  |

|    |   |   |           |           |           |    |   |   |           |           |           |
|----|---|---|-----------|-----------|-----------|----|---|---|-----------|-----------|-----------|
| 32 | 1 | 0 | 3.828112  | 0.345959  | -1.279751 | 44 | 1 | 0 | 1.424081  | -5.420269 | -0.047623 |
| 33 | 1 | 0 | 4.556046  | 0.142539  | 0.329661  | 45 | 1 | 0 | 3.600116  | -6.625082 | 0.059134  |
| 34 | 1 | 0 | 5.137348  | -0.826192 | -1.043670 | 46 | 1 | 0 | 5.737458  | -5.380792 | 0.000501  |
| 35 | 1 | 0 | 1.805072  | 1.793066  | 2.866317  | 47 | 1 | 0 | 5.759564  | -2.898763 | -0.166222 |
| 36 | 1 | 0 | 1.835101  | 0.215095  | 2.045493  | 48 | 1 | 0 | 1.530014  | 4.878406  | -2.362623 |
| 37 | 1 | 0 | 3.354971  | 1.115444  | 2.302494  | 49 | 1 | 0 | 2.327021  | 6.759283  | -0.935041 |
| 38 | 1 | 0 | -0.486324 | -2.101828 | -1.095504 | 50 | 1 | 0 | 3.036301  | 6.364168  | 1.398867  |
| 39 | 1 | 0 | -0.121121 | -3.840955 | -0.967878 | 51 | 1 | 0 | 2.977100  | 4.075098  | 2.380524  |
| 40 | 1 | 0 | -0.577380 | -2.919026 | 0.487065  | 52 | 1 | 0 | -5.255523 | 0.923568  | 1.190530  |
| 41 | 1 | 0 | 0.034201  | 2.593260  | -2.809445 | 53 | 1 | 0 | -4.330016 | -0.039082 | 2.377553  |
| 42 | 1 | 0 | 1.679452  | 2.212874  | -3.390461 | 54 | 1 | 0 | -3.738281 | 1.561500  | 1.853088  |
| 43 | 1 | 0 | 0.653669  | 0.919901  | -2.702969 |    |   |   |           |           |           |

$$- \quad r(P_A-C_A) = 2.500 \text{ \AA}$$

| -----       |        |        |             |           |           | ----- |    |   |           |           |           |
|-------------|--------|--------|-------------|-----------|-----------|-------|----|---|-----------|-----------|-----------|
| Center      | Atomic | Atomic | Coordinates |           |           |       |    |   |           |           |           |
| (Angstroms) |        |        | X           | Y         | Z         |       |    |   |           |           |           |
| Number      | Number | Type   |             |           |           |       |    |   |           |           |           |
| -----       |        |        |             |           |           | ----- |    |   |           |           |           |
| 1           | 6      | 0      | -4.004742   | -3.494807 | 0.926163  | 26    | 17 | 0 | 1.364104  | -1.110225 | 2.445662  |
| 2           | 6      | 0      | -3.245945   | -2.421119 | 0.470483  | 27    | 7  | 0 | 3.093836  | -1.285701 | 0.126276  |
| 3           | 6      | 0      | -3.216814   | -2.070682 | -0.891343 | 28    | 6  | 0 | 3.682431  | -2.526733 | 0.655207  |
| 4           | 6      | 0      | -3.938561   | -2.788396 | -1.839878 | 29    | 15 | 0 | 3.952650  | -0.118505 | -0.720682 |
| 5           | 6      | 0      | -4.698589   | -3.871472 | -1.383699 | 30    | 17 | 0 | 4.879276  | -1.240305 | -2.282644 |
| 6           | 6      | 0      | -4.732978   | -4.216084 | -0.026544 | 31    | 17 | 0 | 5.685317  | 0.173143  | 0.494437  |
| 7           | 7      | 0      | -2.430229   | -1.516441 | 1.135242  | 32    | 1  | 0 | -3.885033 | 1.410157  | -0.929697 |
| 8           | 6      | 0      | -1.882496   | -0.610702 | 0.243548  | 33    | 1  | 0 | -3.647425 | 1.129421  | 0.809359  |
| 9           | 7      | 0      | -2.387578   | -0.960698 | -1.002780 | 34    | 1  | 0 | -4.244892 | 2.696697  | 0.242960  |
| 10          | 6      | 0      | -0.899527   | 0.333097  | 0.536317  | 35    | 1  | 0 | -1.760927 | -2.408718 | 2.914817  |
| 11          | 15     | 0      | 1.376529    | -0.684010 | 0.349046  | 36    | 1  | 0 | -1.564321 | -0.645165 | 2.793280  |
| 12          | 17     | 0      | 0.497642    | -2.481582 | -0.389355 | 37    | 1  | 0 | -3.187001 | -1.345465 | 3.086106  |
| 13          | 6      | 0      | -1.944696   | -0.396513 | -2.263820 | 38    | 1  | 0 | 2.037225  | 2.293983  | 0.360913  |
| 14          | 6      | 0      | -2.228169   | -1.480574 | 2.572088  | 39    | 1  | 0 | 1.474648  | 3.404233  | 1.633704  |
| 15          | 6      | 0      | -1.042816   | 1.673230  | 0.313680  | 40    | 1  | 0 | 1.170095  | 1.666406  | 1.791946  |
| 16          | 7      | 0      | -0.053061   | 2.662406  | 0.435893  | 41    | 1  | 0 | -1.607461 | -1.198470 | -2.928225 |
| 17          | 6      | 0      | -0.564277   | 3.911876  | 0.106673  | 42    | 1  | 0 | -2.725017 | 0.161609  | -2.753749 |
| 18          | 6      | 0      | -1.927728   | 3.743442  | -0.190486 | 43    | 1  | 0 | -1.111360 | 0.277186  | -2.063551 |
| 19          | 7      | 0      | -2.213625   | 2.388913  | -0.043122 | 44    | 1  | 0 | 1.090028  | 5.297713  | 0.271258  |
| 20          | 6      | 0      | -2.725589   | 4.824131  | -0.546974 | 45    | 1  | 0 | -0.325544 | 7.247777  | -0.350645 |
| 21          | 6      | 0      | -2.124261   | 6.091284  | -0.594456 | 46    | 1  | 0 | -2.725017 | 6.951540  | -0.874853 |
| 22          | 6      | 0      | -0.770184   | 6.258284  | -0.298947 | 47    | 1  | 0 | -3.776050 | 4.699600  | -0.791041 |
| 23          | 6      | 0      | 0.034838    | 5.165105  | 0.054943  | 48    | 1  | 0 | -3.916522 | -2.521202 | -2.891570 |
| 24          | 6      | 0      | 1.234655    | 2.490773  | 1.079671  | 49    | 1  | 0 | -5.272849 | -4.453604 | -2.098217 |
| 25          | 6      | 0      | -3.565344   | 1.871837  | 0.011829  | 50    | 1  | 0 | -5.334276 | -5.061103 | 0.295360  |
|             |        |        |             |           |           | 51    | 1  | 0 | -4.027431 | -3.767765 | 1.976248  |
|             |        |        |             |           |           | 52    | 1  | 0 | 4.368261  | -2.957272 | -0.080230 |
|             |        |        |             |           |           | 53    | 1  | 0 | 4.224606  | -2.326270 | 1.584339  |
|             |        |        |             |           |           | 54    | 1  | 0 | 2.885692  | -3.246294 | 0.851050  |

$$- \quad r(P_A-C_A) = 2.400 \text{ \AA}$$

| -----       |        |        |             |           |           | ----- |    |   |           |           |           |
|-------------|--------|--------|-------------|-----------|-----------|-------|----|---|-----------|-----------|-----------|
| Center      | Atomic | Atomic | Coordinates |           |           |       |    |   |           |           |           |
| (Angstroms) |        |        | X           | Y         | Z         |       |    |   |           |           |           |
| Number      | Number | Type   |             |           |           |       |    |   |           |           |           |
| -----       |        |        |             |           |           | ----- |    |   |           |           |           |
| 1           | 6      | 0      | -4.129554   | -3.359321 | 0.928663  | 19    | 7  | 0 | -2.110008 | 2.418802  | -0.029725 |
| 2           | 6      | 0      | -3.326888   | -2.318303 | 0.471341  | 20    | 6  | 0 | -2.555811 | 4.865751  | -0.540769 |
| 3           | 6      | 0      | -3.297658   | -1.958298 | -0.887505 | 21    | 6  | 0 | -1.919115 | 6.114864  | -0.596233 |
| 4           | 6      | 0      | -4.063819   | -2.633240 | -1.833198 | 22    | 6  | 0 | -0.559121 | 6.244526  | -0.308243 |
| 5           | 6      | 0      | -4.867805   | -3.682636 | -1.375738 | 23    | 6  | 0 | 0.216459  | 5.130673  | 0.045795  |
| 6           | 6      | 0      | -4.901952   | -4.036885 | -0.020397 | 24    | 6  | 0 | 1.339929  | 2.441779  | 1.096340  |
| 7           | 7      | 0      | -2.462259   | -1.457246 | 1.132900  | 25    | 6  | 0 | -3.478690 | 1.949309  | 0.049083  |
| 8           | 6      | 0      | -1.884408   | -0.574366 | 0.241332  | 26    | 17 | 0 | 1.311760  | -1.141776 | 2.435941  |
| 9           | 7      | 0      | -2.417649   | -0.888306 | -1.000101 | 27    | 7  | 0 | 3.041577  | -1.363127 | 0.124754  |
| 10          | 6      | 0      | -0.849469   | 0.323519  | 0.526528  | 28    | 6  | 0 | 3.583927  | -2.627556 | 0.643157  |
| 11          | 15     | 0      | 1.318907    | -0.687988 | 0.339449  | 29    | 15 | 0 | 3.937557  | -0.226145 | -0.710177 |
| 12          | 17     | 0      | 0.418420    | -2.467437 | -0.426382 | 30    | 17 | 0 | 4.840914  | -1.364295 | -2.281295 |
| 13          | 6      | 0      | -1.962083   | -0.336840 | -2.263114 | 31    | 17 | 0 | 5.684970  | 0.008771  | 0.506633  |
| 14          | 6      | 0      | -2.248110   | -1.440625 | 2.569228  | 32    | 1  | 0 | -3.831019 | 1.498639  | -0.885872 |
| 15          | 6      | 0      | -0.956739   | 1.672678  | 0.318640  | 33    | 1  | 0 | -3.574639 | 1.212216  | 0.849756  |
| 16          | 7      | 0      | 0.060357    | 2.632864  | 0.437690  | 34    | 1  | 0 | -4.123545 | 2.798762  | 0.290260  |
| 17          | 6      | 0      | -0.417909   | 3.895148  | 0.104524  | 35    | 1  | 0 | -1.794610 | -2.380198 | 2.898246  |
| 18          | 6      | 0      | -1.786208   | 3.764533  | -0.184760 | 36    | 1  | 0 | -1.567978 | -0.620399 | 2.796219  |
|             |        |        |             |           |           | 37    | 1  | 0 | -3.201939 | -1.294803 | 3.089074  |
|             |        |        |             |           |           | 38    | 1  | 0 | 2.146387  | 2.230399  | 0.386897  |
|             |        |        |             |           |           | 39    | 1  | 0 | 1.586709  | 3.354000  | 1.649653  |
|             |        |        |             |           |           | 40    | 1  | 0 | 1.256927  | 1.622773  | 1.812530  |
|             |        |        |             |           |           | 41    | 1  | 0 | -1.664561 | -1.149568 | -2.933000 |

|    |   |   |           |           |           |
|----|---|---|-----------|-----------|-----------|
| 42 | 1 | 0 | -2.749055 | 0.256214  | -2.742170 |
| 43 | 1 | 0 | -1.099393 | 0.300097  | -2.068135 |
| 44 | 1 | 0 | 1.276045  | 5.234054  | 0.256082  |
| 45 | 1 | 0 | -0.087009 | 7.220805  | -0.366252 |
| 46 | 1 | 0 | -2.496563 | 6.990763  | -0.877021 |
| 47 | 1 | 0 | -3.610611 | 4.770075  | -0.778923 |
| 48 | 1 | 0 | -4.041384 | -2.359043 | -2.883018 |

|    |   |   |           |           |           |
|----|---|---|-----------|-----------|-----------|
| 49 | 1 | 0 | -5.477181 | -4.231717 | -2.087259 |
| 50 | 1 | 0 | -5.538168 | -4.855741 | 0.301837  |
| 51 | 1 | 0 | -4.151668 | -3.640317 | 1.976582  |
| 52 | 1 | 0 | 4.215819  | -3.103297 | -0.113214 |
| 53 | 1 | 0 | 4.174126  | -2.448805 | 1.547571  |
| 54 | 1 | 0 | 2.759262  | -3.301576 | 0.881139  |

-  $r(P_A-C_A) = 2.300 \text{ \AA}$

| Center (Angstroms) |               |             | Coordinates |           |           |
|--------------------|---------------|-------------|-------------|-----------|-----------|
| Number             | Atomic Number | Atomic Type | X           | Y         | Z         |
| 1                  | 6             | 0           | -4.740314   | -2.151285 | 1.599202  |
| 2                  | 6             | 0           | -3.727789   | -1.634965 | 0.794415  |
| 3                  | 6             | 0           | -3.583056   | -2.032817 | -0.545259 |
| 4                  | 6             | 0           | -4.449065   | -2.955219 | -1.126539 |
| 5                  | 6             | 0           | -5.465128   | -3.475290 | -0.319669 |
| 6                  | 6             | 0           | -5.606344   | -3.082450 | 1.018836  |
| 7                  | 7             | 0           | -2.725072   | -0.706815 | 1.044831  |
| 8                  | 6             | 0           | -1.954939   | -0.509353 | -0.091245 |
| 9                  | 7             | 0           | -2.501375   | -1.329855 | -1.061166 |
| 10                 | 6             | 0           | -0.777157   | 0.249797  | -0.163685 |
| 11                 | 15            | 0           | 1.270716    | -0.794071 | -0.082705 |
| 12                 | 17            | 0           | 0.597465    | -2.371460 | -1.340864 |
| 13                 | 6             | 0           | -2.176104   | -1.292521 | -2.476982 |
| 14                 | 6             | 0           | -2.492798   | -0.076990 | 2.332188  |
| 15                 | 6             | 0           | -0.767836   | 1.622920  | -0.092125 |
| 16                 | 7             | 0           | 0.264928    | 2.469412  | 0.330864  |
| 17                 | 6             | 0           | -0.086847   | 3.801541  | 0.121042  |
| 18                 | 6             | 0           | -1.389493   | 3.819111  | -0.401390 |
| 19                 | 7             | 0           | -1.796558   | 2.490767  | -0.514128 |
| 20                 | 6             | 0           | -2.031298   | 5.018247  | -0.690078 |
| 21                 | 6             | 0           | -1.327779   | 6.207235  | -0.450577 |
| 22                 | 6             | 0           | -0.031379   | 6.188591  | 0.068999  |
| 23                 | 6             | 0           | 0.612017    | 4.978417  | 0.363348  |
| 24                 | 6             | 0           | 1.361845    | 2.119763  | 1.221585  |
| 25                 | 6             | 0           | -2.964640   | 2.070299  | -1.258942 |

|    |    |   |           |           |           |
|----|----|---|-----------|-----------|-----------|
| 26 | 17 | 0 | 0.726070  | -1.621270 | 1.838425  |
| 27 | 7  | 0 | 3.005944  | -1.570011 | 0.044973  |
| 28 | 6  | 0 | 3.354757  | -2.940192 | 0.440522  |
| 29 | 15 | 0 | 4.115179  | -0.378421 | -0.287882 |
| 30 | 17 | 0 | 5.426470  | -1.288530 | -1.720234 |
| 31 | 17 | 0 | 5.459640  | -0.451096 | 1.392492  |
| 32 | 1  | 0 | -2.674311 | 1.394178  | -2.069154 |
| 33 | 1  | 0 | -3.703097 | 1.568467  | -0.624501 |
| 34 | 1  | 0 | -3.434218 | 2.951141  | -1.699776 |
| 35 | 1  | 0 | -2.579804 | -0.825769 | 3.124295  |
| 36 | 1  | 0 | -1.482264 | 0.328568  | 2.337368  |
| 37 | 1  | 0 | -3.214892 | 0.727599  | 2.512215  |
| 38 | 1  | 0 | 2.307809  | 2.003663  | 0.685143  |
| 39 | 1  | 0 | 1.471878  | 2.913696  | 1.968614  |
| 40 | 1  | 0 | 1.126997  | 1.191114  | 1.743487  |
| 41 | 1  | 0 | -1.906254 | -2.289166 | -2.833273 |
| 42 | 1  | 0 | -3.039481 | -0.924562 | -3.045084 |
| 43 | 1  | 0 | -1.325851 | -0.627183 | -2.617197 |
| 44 | 1  | 0 | 1.624477  | 4.965208  | 0.753499  |
| 45 | 1  | 0 | 0.491886  | 7.123591  | 0.245342  |
| 46 | 1  | 0 | -1.804986 | 7.157027  | -0.673315 |
| 47 | 1  | 0 | -3.043939 | 5.045675  | -1.080213 |
| 48 | 1  | 0 | -4.338993 | -3.263665 | -2.161031 |
| 49 | 1  | 0 | -6.157041 | -4.198995 | -0.739749 |
| 50 | 1  | 0 | -6.405569 | -3.507387 | 1.618592  |
| 51 | 1  | 0 | -4.857341 | -1.843833 | 2.633249  |
| 52 | 1  | 0 | 4.115485  | -3.346639 | -0.234028 |
| 53 | 1  | 0 | 3.736742  | -2.958616 | 1.466748  |
| 54 | 1  | 0 | 2.465407  | -3.570218 | 0.381190  |

-  $r(P_A-C_A) = 2.200 \text{ \AA}$

| Center (Angstroms) |               |             | Coordinates |           |           |
|--------------------|---------------|-------------|-------------|-----------|-----------|
| Number             | Atomic Number | Atomic Type | X           | Y         | Z         |
| 1                  | 6             | 0           | -4.762367   | -2.036836 | 1.644326  |
| 2                  | 6             | 0           | -3.740102   | -1.572582 | 0.819582  |
| 3                  | 6             | 0           | -3.609675   | -2.018064 | -0.505793 |
| 4                  | 6             | 0           | -4.499800   | -2.937981 | -1.054632 |
| 5                  | 6             | 0           | -5.524806   | -3.405548 | -0.228387 |
| 6                  | 6             | 0           | -5.651852   | -2.965019 | 1.097323  |
| 7                  | 7             | 0           | -2.713049   | -0.662353 | 1.035796  |
| 8                  | 6             | 0           | -1.945174   | -0.522815 | -0.107743 |
| 9                  | 7             | 0           | -2.513698   | -1.358108 | -1.048812 |
| 10                 | 6             | 0           | -0.746134   | 0.212465  | -0.205943 |
| 11                 | 15            | 0           | 1.222044    | -0.767113 | -0.124080 |
| 12                 | 17            | 0           | 0.616252    | -2.326098 | -1.437708 |
| 13                 | 6             | 0           | -2.215237   | -1.360774 | -2.472482 |
| 14                 | 6             | 0           | -2.456394   | -0.003835 | 2.305014  |
| 15                 | 6             | 0           | -0.735109   | 1.591439  | -0.119469 |
| 16                 | 7             | 0           | 0.286145    | 2.432412  | 0.330751  |
| 17                 | 6             | 0           | -0.064685   | 3.766169  | 0.124389  |
| 18                 | 6             | 0           | -1.357720   | 3.784810  | -0.419038 |
| 19                 | 7             | 0           | -1.756887   | 2.455669  | -0.554336 |
| 20                 | 6             | 0           | -2.000304   | 4.983937  | -0.707239 |
| 21                 | 6             | 0           | -1.304483   | 6.172019  | -0.446179 |
| 22                 | 6             | 0           | -0.015655   | 6.152573  | 0.093823  |
| 23                 | 6             | 0           | 0.627208    | 4.942999  | 0.388175  |

|    |    |   |           |           |           |
|----|----|---|-----------|-----------|-----------|
| 24 | 6  | 0 | 1.372688  | 2.083322  | 1.238042  |
| 25 | 6  | 0 | -2.900588 | 2.041306  | -1.341222 |
| 26 | 17 | 0 | 0.679751  | -1.664616 | 1.772314  |
| 27 | 7  | 0 | 3.005510  | -1.581293 | 0.022545  |
| 28 | 6  | 0 | 3.338802  | -2.963366 | 0.377561  |
| 29 | 15 | 0 | 4.112988  | -0.387942 | -0.242287 |
| 30 | 17 | 0 | 5.487083  | -1.245752 | -1.660888 |
| 31 | 17 | 0 | 5.425869  | -0.487080 | 1.476766  |
| 32 | 1  | 0 | -2.584585 | 1.342924  | -2.121641 |
| 33 | 1  | 0 | -3.676732 | 1.567486  | -0.730660 |
| 34 | 1  | 0 | -3.330919 | 2.921290  | -1.822308 |
| 35 | 1  | 0 | -2.596024 | -0.720973 | 3.118124  |
| 36 | 1  | 0 | -1.423627 | 0.340404  | 2.311981  |
| 37 | 1  | 0 | -3.131804 | 0.846800  | 2.449974  |
| 38 | 1  | 0 | 2.326112  | 1.973368  | 0.714807  |
| 39 | 1  | 0 | 1.464763  | 2.875749  | 1.988800  |
| 40 | 1  | 0 | 1.136531  | 1.151214  | 1.753016  |
| 41 | 1  | 0 | -1.950479 | -2.366486 | -2.805427 |
| 42 | 1  | 0 | -3.092681 | -1.010823 | -3.029962 |
| 43 | 1  | 0 | -1.369317 | -0.699736 | -2.650494 |
| 44 | 1  | 0 | 1.633328  | 4.929743  | 0.794082  |
| 45 | 1  | 0 | 0.501337  | 7.087798  | 0.286323  |
| 46 | 1  | 0 | -1.780623 | 7.122526  | -0.667799 |
| 47 | 1  | 0 | -3.006819 | 5.010783  | -1.112792 |
| 48 | 1  | 0 | -4.400218 | -3.283719 | -2.078261 |
| 49 | 1  | 0 | -6.235475 | -4.125960 | -0.621822 |
| 50 | 1  | 0 | -6.458941 | -3.350776 | 1.712729  |
| 51 | 1  | 0 | -4.868737 | -1.692639 | 2.667822  |

52 1 0 4.073000 -3.371749 -0.325744  
 53 1 0 3.749723 -3.013773 1.392172

54 1 0 2.436632 -3.576931 0.332108

-  $r(\text{P}_A\text{-C}_A) = 2.100 \text{ \AA}$

| Center<br>(Angstroms) |        | Atomic | Atomic    | Coordinates |           |  |
|-----------------------|--------|--------|-----------|-------------|-----------|--|
| Number                | Number | Type   | X         | Y           | Z         |  |
| 1                     | 6      | 0      | -4.767435 | -1.964347   | 1.684478  |  |
| 2                     | 6      | 0      | -3.742213 | -1.538368   | 0.842064  |  |
| 3                     | 6      | 0      | -3.626462 | -2.019683   | -0.471410 |  |
| 4                     | 6      | 0      | -4.534007 | -2.939429   | -0.992561 |  |
| 5                     | 6      | 0      | -5.560891 | -3.368336   | -0.149300 |  |
| 6                     | 6      | 0      | -5.673643 | -2.891406   | 1.165930  |  |
| 7                     | 7      | 0      | -2.697817 | -0.641012   | 1.029010  |  |
| 8                     | 6      | 0      | -1.938160 | -0.545017   | -0.120857 |  |
| 9                     | 7      | 0      | -2.523613 | -1.390588   | -1.037708 |  |
| 10                    | 6      | 0      | -0.724229 | 0.177712    | -0.243559 |  |
| 11                    | 15     | 0      | 1.162946  | -0.739969   | -0.163356 |  |
| 12                    | 17     | 0      | 0.638412  | -2.292939   | -1.515190 |  |
| 13                    | 6      | 0      | -2.245096 | -1.429300   | -2.466453 |  |
| 14                    | 6      | 0      | -2.417896 | 0.038485    | 2.283496  |  |
| 15                    | 6      | 0      | -0.721054 | 1.563924    | -0.147101 |  |
| 16                    | 7      | 0      | 0.284847  | 2.406591    | 0.321272  |  |
| 17                    | 6      | 0      | -0.077778 | 3.739129    | 0.123039  |  |
| 18                    | 6      | 0      | -1.365977 | 3.748369    | -0.429792 |  |
| 19                    | 7      | 0      | -1.746421 | 2.415299    | -0.585330 |  |
| 20                    | 6      | 0      | -2.022148 | 4.941942    | -0.711757 |  |
| 21                    | 6      | 0      | -1.342062 | 6.134523    | -0.435091 |  |
| 22                    | 6      | 0      | -0.055673 | 6.124813    | 0.113202  |  |
| 23                    | 6      | 0      | 0.599744  | 4.921572    | 0.401328  |  |
| 24                    | 6      | 0      | 1.384102  | 2.061369    | 1.218364  |  |
| 25                    | 6      | 0      | -2.872460 | 1.998368    | -1.398072 |  |

|    |    |   |           |           |           |  |
|----|----|---|-----------|-----------|-----------|--|
| 26 | 17 | 0 | 0.649213  | -1.705589 | 1.709304  |  |
| 27 | 7  | 0 | 3.040735  | -1.587892 | -0.001393 |  |
| 28 | 6  | 0 | 3.369139  | -2.974053 | 0.324160  |  |
| 29 | 15 | 0 | 4.124602  | -0.384402 | -0.207565 |  |
| 30 | 17 | 0 | 5.582299  | -1.177339 | -1.600295 |  |
| 31 | 17 | 0 | 5.411024  | -0.467400 | 1.555615  |  |
| 32 | 1  | 0 | -2.537992 | 1.286326  | -2.157450 |  |
| 33 | 1  | 0 | -3.669906 | 1.540798  | -0.802878 |  |
| 34 | 1  | 0 | -3.279675 | 2.874829  | -1.905150 |  |
| 35 | 1  | 0 | -2.599171 | -0.650796 | 3.111822  |  |
| 36 | 1  | 0 | -1.369350 | 0.330382  | 2.293274  |  |
| 37 | 1  | 0 | -3.052371 | 0.923968  | 2.400138  |  |
| 38 | 1  | 0 | 2.330187  | 1.946533  | 0.683955  |  |
| 39 | 1  | 0 | 1.482197  | 2.859092  | 1.961973  |  |
| 40 | 1  | 0 | 1.155438  | 1.132439  | 1.742675  |  |
| 41 | 1  | 0 | -1.978750 | -2.441708 | -2.775956 |  |
| 42 | 1  | 0 | -3.134872 | -1.099837 | -3.016276 |  |
| 43 | 1  | 0 | -1.406301 | -0.769192 | -2.676419 |  |
| 44 | 1  | 0 | 1.603463  | 4.916904  | 0.812942  |  |
| 45 | 1  | 0 | 0.448847  | 7.064387  | 0.316837  |  |
| 46 | 1  | 0 | -1.827125 | 7.081720  | -0.651026 |  |
| 47 | 1  | 0 | -3.025874 | 4.959955  | -1.124462 |  |
| 48 | 1  | 0 | -4.445076 | -3.313634 | -2.007031 |  |
| 49 | 1  | 0 | -6.285029 | -4.087502 | -0.519581 |  |
| 50 | 1  | 0 | -6.483237 | -3.248760 | 1.794922  |  |
| 51 | 1  | 0 | -4.862774 | -1.592669 | 2.699327  |  |
| 52 | 1  | 0 | 4.093141  | -3.378147 | -0.393482 |  |
| 53 | 1  | 0 | 3.792849  | -3.048500 | 1.333020  |  |
| 54 | 1  | 0 | 2.463113  | -3.583862 | 0.280656  |  |

Optimized structure of the transition state for the formation of  $[2\text{-PCI}_2][\text{Cl}]$ .

| Center<br>(Angstroms) |        | Atomic | Atomic    | Coordinates |           |  |
|-----------------------|--------|--------|-----------|-------------|-----------|--|
| Number                | Number | Type   | X         | Y           | Z         |  |
| 1                     | 6      | 0      | 0.769103  | 4.835777    | 0.359264  |  |
| 2                     | 6      | 0      | 0.049980  | 3.678221    | 0.076878  |  |
| 3                     | 6      | 0      | -1.243950 | 3.734949    | -0.457442 |  |
| 4                     | 6      | 0      | -1.869283 | 4.950983    | -0.714798 |  |
| 5                     | 6      | 0      | -1.148946 | 6.116819    | -0.432611 |  |
| 6                     | 6      | 0      | 0.145887  | 6.060076    | 0.096014  |  |
| 7                     | 7      | 0      | 0.371917  | 2.331441    | 0.252712  |  |
| 8                     | 6      | 0      | -0.662921 | 1.534815    | -0.214726 |  |
| 9                     | 7      | 0      | -1.664022 | 2.415448    | -0.631290 |  |
| 10                    | 6      | 0      | -0.723337 | 0.140681    | -0.324132 |  |
| 11                    | 15     | 0      | 1.047032  | -0.806535   | -0.290932 |  |
| 12                    | 17     | 0      | 0.592821  | -1.826913   | 1.557117  |  |
| 13                    | 6      | 0      | -2.811847 | 2.044238    | -1.438190 |  |
| 14                    | 6      | 0      | 1.504094  | 1.934981    | 1.091087  |  |
| 15                    | 6      | 0      | -1.971299 | -0.524101   | -0.140356 |  |
| 16                    | 7      | 0      | -2.623796 | -1.360594   | -1.013714 |  |
| 17                    | 6      | 0      | -3.742216 | -1.911338   | -0.397422 |  |
| 18                    | 6      | 0      | -3.794888 | -1.383143   | 0.901514  |  |
| 19                    | 7      | 0      | -2.696544 | -0.540726   | 1.031022  |  |
| 20                    | 6      | 0      | -4.711470 | -2.797378   | -0.864508 |  |
| 21                    | 6      | 0      | -5.734720 | -3.142142   | 0.019201  |  |
| 22                    | 6      | 0      | -5.785033 | -2.617631   | 1.321081  |  |
| 23                    | 6      | 0      | -4.817635 | -1.725508   | 1.784960  |  |
| 24                    | 6      | 0      | -2.389645 | -1.460709   | -2.449042 |  |
| 25                    | 6      | 0      | -2.330259 | 0.146788    | 2.260485  |  |

|    |    |   |           |           |           |  |
|----|----|---|-----------|-----------|-----------|--|
| 26 | 17 | 0 | 0.550859  | -2.352464 | -1.652552 |  |
| 27 | 7  | 0 | 3.103060  | -1.743621 | -0.143323 |  |
| 28 | 15 | 0 | 4.127095  | -0.512775 | -0.293792 |  |
| 29 | 17 | 0 | 5.081614  | -0.197433 | 1.716543  |  |
| 30 | 6  | 0 | 3.401816  | -3.097304 | 0.296114  |  |
| 31 | 17 | 0 | 5.894212  | -1.336649 | -1.254210 |  |
| 32 | 1  | 0 | -2.513522 | 1.298147  | -2.179006 |  |
| 33 | 1  | 0 | -3.634414 | 1.645733  | -0.834887 |  |
| 34 | 1  | 0 | -3.166618 | 2.930985  | -1.966504 |  |
| 35 | 1  | 0 | -2.579715 | -0.491711 | 3.110825  |  |
| 36 | 1  | 0 | -1.255354 | 0.318840  | 2.257049  |  |
| 37 | 1  | 0 | -2.861829 | 1.100078  | 2.350824  |  |
| 38 | 1  | 0 | 2.414459  | 1.781150  | 0.507826  |  |
| 39 | 1  | 0 | 1.673323  | 2.725848  | 1.827670  |  |
| 40 | 1  | 0 | 1.266800  | 1.015933  | 1.628811  |  |
| 41 | 1  | 0 | -2.164911 | -2.491766 | -2.727092 |  |
| 42 | 1  | 0 | -3.286177 | -1.122259 | -2.981408 |  |
| 43 | 1  | 0 | -1.537250 | -0.837193 | -2.709172 |  |
| 44 | 1  | 0 | 1.778216  | 4.795722  | 0.754946  |  |
| 45 | 1  | 0 | 0.681436  | 6.981381  | 0.303274  |  |
| 46 | 1  | 0 | -1.606790 | 7.081616  | -0.628581 |  |
| 47 | 1  | 0 | -2.877299 | 5.004019  | -1.113596 |  |
| 48 | 1  | 0 | -4.670546 | -3.208632 | -1.867554 |  |
| 49 | 1  | 0 | -6.506192 | -3.832777 | -0.306902 |  |
| 50 | 1  | 0 | -6.594526 | -2.910991 | 1.982325  |  |
| 51 | 1  | 0 | -4.864930 | -1.317723 | 2.789160  |  |
| 52 | 1  | 0 | 4.271686  | -3.499515 | -0.238705 |  |
| 53 | 1  | 0 | 3.611712  | -3.129254 | 1.373634  |  |
| 54 | 1  | 0 | 2.544062  | -3.747245 | 0.092577  |  |

Optimized structure for  $[2\text{-PCI}_2][\text{Cl}]$ .

| -----       |        |        |             |           |           | 23    | 6  | 0 | -5.250469 | 2.590902  | 6.291178  |
|-------------|--------|--------|-------------|-----------|-----------|-------|----|---|-----------|-----------|-----------|
| Center      | Atomic | Atomic | Coordinates |           |           | 24    | 6  | 0 | -4.131820 | -0.300888 | 6.263646  |
| (Angstroms) |        |        |             |           |           | 25    | 6  | 0 | -0.971831 | 2.834607  | 3.979618  |
| Number      | Number | Type   | X           | Y         | Z         | 26    | 17 | 0 | 0.338098  | -2.643730 | 5.201769  |
| -----       |        |        |             |           |           | 27    | 17 | 0 | -2.838334 | -2.848761 | 4.162146  |
| 1           | 6      | 0      | 0.029018    | 0.036130  | -0.023814 | 28    | 1  | 0 | -0.117447 | 2.422986  | 4.521600  |
| 2           | 6      | 0      | -0.000948   | 0.003104  | 1.370840  | 29    | 1  | 0 | -0.831656 | 2.684339  | 2.904429  |
| 3           | 6      | 0      | 1.182064    | -0.009682 | 2.127108  | 30    | 1  | 0 | -1.019434 | 3.906712  | 4.179770  |
| 4           | 6      | 0      | 2.438368    | 0.011129  | 1.521143  | 31    | 1  | 0 | -2.526983 | -0.646555 | 0.948180  |
| 5           | 6      | 0      | 2.467780    | 0.043347  | 0.128377  | 32    | 1  | 0 | -2.947861 | -0.808507 | 2.661918  |
| 6           | 6      | 0      | 1.283645    | 0.052781  | -0.630251 | 33    | 1  | 0 | -2.946558 | 0.819957  | 1.876218  |
| 7           | 7      | 0      | -1.052950   | -0.029813 | 2.279437  | 34    | 1  | 0 | -3.790928 | -0.470443 | 7.288820  |
| 8           | 6      | 0      | -0.556010   | -0.041017 | 3.554227  | 35    | 1  | 0 | -5.208841 | -0.117727 | 6.265576  |
| 9           | 7      | 0      | 0.806361    | -0.020884 | 3.463971  | 36    | 1  | 0 | -3.939089 | -1.181444 | 5.645479  |
| 10          | 6      | 0      | -1.354546   | -0.088928 | 4.747445  | 37    | 1  | 0 | 2.429912  | -0.667573 | 4.630410  |
| 11          | 15     | 0      | -1.344077   | -1.564433 | 5.880260  | 38    | 1  | 0 | 2.311327  | 1.100322  | 4.380923  |
| 12          | 17     | 0      | -0.193430   | -0.379485 | 7.609475  | 39    | 1  | 0 | 1.197568  | 0.256317  | 5.505526  |
| 13          | 6      | 0      | 1.745826    | 0.180065  | 4.565654  | 40    | 1  | 0 | -5.859140 | 1.947346  | 6.916762  |
| 14          | 6      | 0      | -2.465156   | -0.162332 | 1.924158  | 41    | 1  | 0 | -6.509757 | 4.313456  | 6.531673  |
| 15          | 6      | 0      | -2.308750   | 0.920453  | 4.955166  | 42    | 1  | 0 | -5.117240 | 5.800698  | 5.130583  |
| 16          | 7      | 0      | -3.480537   | 0.874746  | 5.682798  | 43    | 1  | 0 | -3.041723 | 4.959092  | 4.053778  |
| 17          | 6      | 0      | -4.083746   | 2.131340  | 5.686261  | 44    | 1  | 0 | 3.351530  | -0.003520 | 2.106428  |
| 18          | 6      | 0      | -3.291872   | 2.977189  | 4.898985  | 45    | 1  | 0 | 3.426036  | 0.057925  | -0.381628 |
| 19          | 7      | 0      | -2.197644   | 2.222820  | 4.471129  | 46    | 1  | 0 | 1.346998  | 0.072497  | -1.713874 |
| 20          | 6      | 0      | -3.643984   | 4.304457  | 4.675485  | 47    | 1  | 0 | -0.881040 | 0.046849  | -0.613921 |
| 21          | 6      | 0      | -4.816387   | 4.768392  | 5.280878  | ----- |    |   |           |           |           |
| 22          | 6      | 0      | -5.605188   | 3.925660  | 6.073303  |       |    |   |           |           |           |



Selected NMR spectra:

chitra 12th april

<sup>1</sup>H-NMR Spectrum of

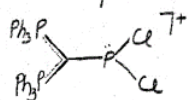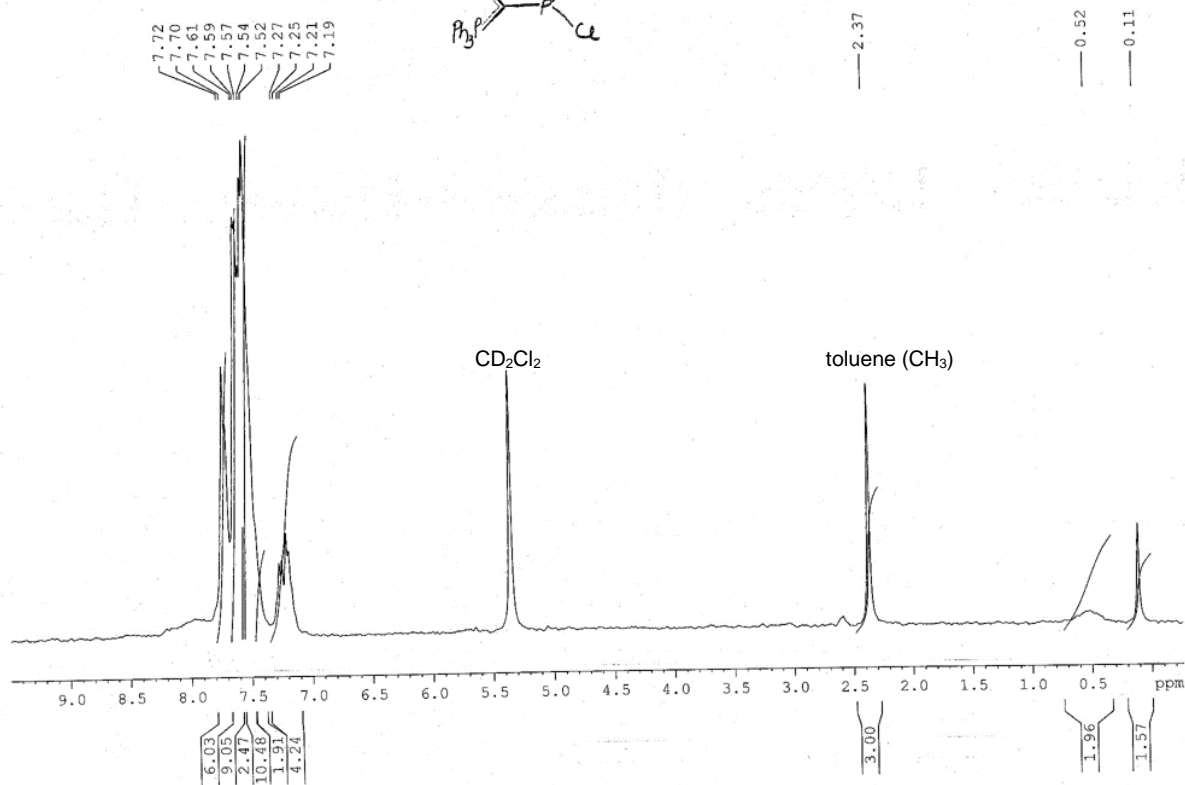

<sup>1</sup>H NMR Spectrum of

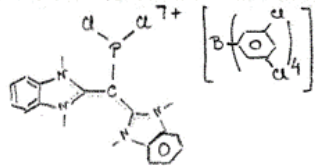

7.516  
7.502  
7.495  
7.406  
7.399  
7.391  
7.383  
6.945  
6.938  
6.932  
6.810  
6.805  
6.800

3.678

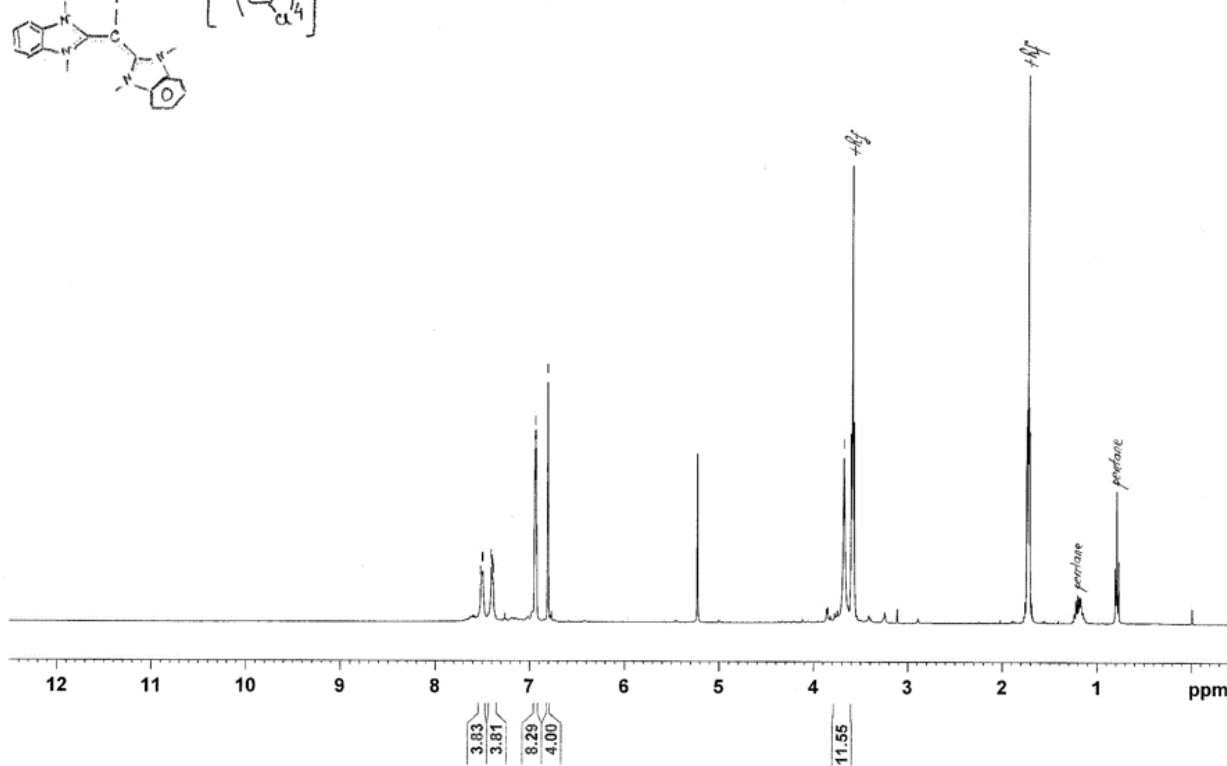

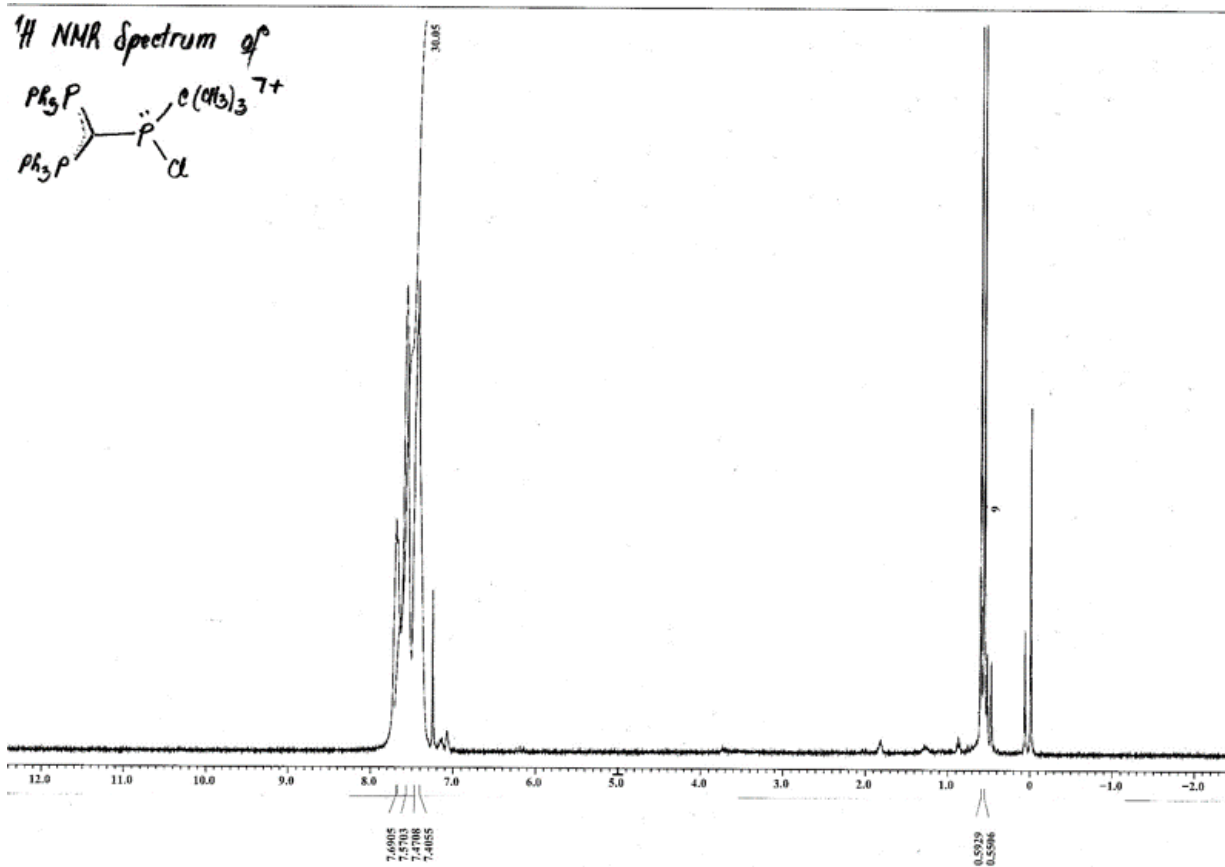

#### References:

- S1 (a) A. R. Davies, A. T. Dronsfield, R. N. Haszeldine, D. R. Taylor, *J. Chem. Soc., Perkin Trans.* **1973**, 1, 379. (b) A. B. Chaplin, A. S. Weller, *Eur. J. Inorg. Chem.*, **2010**, 32, 5124. (c) F. Ramirez, N. B. Desai, B. Hansen, N. McKelvie, *J. Am. Chem. Soc.*, **1961**, 83, 3539. (d) C. A. Dyker, V. Lavallo, B. Donnadiou, G. Bertrand, *Angew. Chem. Int. Ed.* **2008**, 47, 3206.
- S2 SMART version 5.628; Bruker AXS Inc.: Madison, WI, **2001**.
- S3 SAINT+ version 6.22a; Bruker AXS Inc.: Madison, WI, **2001**.
- S4 G. M. Sheldrick, *SADABS*; **1996**.
- S5 SHELXTL version 5.1; Bruker AXS Inc.: Madison, WI, **1997**.
- S6 Gaussian 09, Revision D.01, M. J. Frisch, G. W. Trucks, H. B. Schlegel, G. E. Scuseria, M. A. Robb, J. R. Cheeseman, G. Scalmani, V. Barone, B. Mennucci, G. A. Petersson, H. Nakatsuji, M. Caricato, X. Li, H. P. Hratchian, A. F. Izmaylov, J. Bloino, G. Zheng, J. L. Sonnenberg, M. Hada, M. Ehara, K. Toyota, R. Fukuda, J. Hasegawa, M. Ishida, T. Nakajima, Y. Honda, O. Kitao, H. Nakai, T. Vreven, J. A. Montgomery, Jr., J. E. Peralta, F. Ogliaro, M. Bearpark, J. J. Heyd, E. Brothers, K. N. Kudin, V. N. Staroverov, T. Keith, R. Kobayashi, J. Normand, K. Raghavachari, A. Rendell, J. C. Burant, S. S. Iyengar, J. Tomasi, M. Cossi, N. Rega, J. M. Millam, M. Klene, J. E. Knox, J. B. Cross, V. Bakken, C. Adamo, J. Jaramillo, R. Gomperts, R. E. Stratmann, O. Yazyev, A. J. Austin, R. Cammi, C. Pomelli, J. W. Ochterski, R. L. Martin, K. Morokuma, V. G. Zakrzewski, G. A. Voth, P. Salvador, J. J. Dannenberg, S. Dapprich, A. D. Daniels, O. Farkas, J. B. Foresman, J. V. Ortiz, J. Cioslowski, D. J. Fox, Gaussian, Inc., Wallingford CT, **2013**.
- S7 AIMAll (Version 14.11.23), Todd A. Keith, TK Gristmill Software, Overland Park KS, USA, 2014 (aim.tkgristmill.com)
